# Supplementary material for: Selective Inhibition of SIN3 Corepressor with Avermectins as a Novel Therapeutic Strategy in Triple-Negative Breast Cancer
Source: Oxford University Press journal article supplement (doi:10.1158/1535-7163.mct-14-0980-t), 2015-06-15
Supplement: 15357163mct140980t-sup-140870_2_supp_2980364_nrdrrw.xlsx [file 15357163mct140980t-sup-140870_2_supp_2980364_nrdrrw.xlsx]

## Sheet: Genes modulated by selamectin
Gene Symbol	P-value (SEL 24h vs Untr)	Ratio (SEL 24h vs Untr)	Fold-Change (SEL 24h vs Untr)	Fold-Change (SEL 24h vs Untr) (Description)
ACTG2	0.000370619	4.81481	4.81481	SEL 24h up vs Untr
HSPB8	1.51573e-05	2.52951	2.52951	SEL 24h up vs Untr
ADI1	8.00456e-05	2.40229	2.40229	SEL 24h up vs Untr
RPP40	0.000355724	2.16781	2.16781	SEL 24h up vs Untr
LANCL2	9.84934e-05	2.15811	2.15811	SEL 24h up vs Untr
SEC11C	0.000420439	2.10839	2.10839	SEL 24h up vs Untr
RAD51C	3.50389e-07	2.06963	2.06963	SEL 24h up vs Untr
TRIM29	0.00116827	2.06749	2.06749	SEL 24h up vs Untr
CLN6	4.60543e-05	2.04669	2.04669	SEL 24h up vs Untr
SERPINB8	0.000210113	1.9983	1.9983	SEL 24h up vs Untr
MIR31HG	0.00120249	1.96855	1.96855	SEL 24h up vs Untr
LMAN2L	2.82878e-05	1.95914	1.95914	SEL 24h up vs Untr
PRKAR1B	0.000168977	1.9341	1.9341	SEL 24h up vs Untr
MUC1	0.00059659	1.9161	1.9161	SEL 24h up vs Untr
TAX1BP3	4.78288e-05	1.89979	1.89979	SEL 24h up vs Untr
SLC25A45	1.27929e-05	1.89514	1.89514	SEL 24h up vs Untr
ACTR3C	0.000449374	1.85902	1.85902	SEL 24h up vs Untr
SLC2A1	9.25667e-05	1.85253	1.85253	SEL 24h up vs Untr
STAMBPL1	2.09573e-06	1.85253	1.85253	SEL 24h up vs Untr
SURF2	0.000593242	1.83232	1.83232	SEL 24h up vs Untr
CYP20A1	0.000315771	1.8316	1.8316	SEL 24h up vs Untr
CHMP3	2.53271e-06	1.82423	1.82423	SEL 24h up vs Untr
SLC22A4	1.70852e-06	1.81943	1.81943	SEL 24h up vs Untr
GDAP1	0.00014299	1.81338	1.81338	SEL 24h up vs Untr
FAM222A-AS1	0.000546932	1.80383	1.80383	SEL 24h up vs Untr
PARVA	0.000561755	1.79839	1.79839	SEL 24h up vs Untr
NCOA5	0.000153806	1.78976	1.78976	SEL 24h up vs Untr
GPR56	0.000657625	1.78773	1.78773	SEL 24h up vs Untr
ATP6V0A1	0.000411828	1.77821	1.77821	SEL 24h up vs Untr
SRM	2.85904e-05	1.77704	1.77704	SEL 24h up vs Untr
GTF3C6	0.000112585	1.76173	1.76173	SEL 24h up vs Untr
THNSL1	7.34463e-05	1.7491	1.7491	SEL 24h up vs Untr
POLR3H	0.000244317	1.73207	1.73207	SEL 24h up vs Untr
MED16	2.27425e-05	1.72598	1.72598	SEL 24h up vs Untr
MFSD1	2.33262e-06	1.71208	1.71208	SEL 24h up vs Untr
BRCC3	0.000851162	1.70921	1.70921	SEL 24h up vs Untr
DLX2	0.00017456	1.70796	1.70796	SEL 24h up vs Untr
GLIPR1	0.00089205	1.70303	1.70303	SEL 24h up vs Untr
RAET1E	0.000251326	1.69285	1.69285	SEL 24h up vs Untr
EIF1AX	0.000271941	1.68433	1.68433	SEL 24h up vs Untr
TIMP4	4.17781e-05	1.6761	1.6761	SEL 24h up vs Untr
MPV17L	0.000348802	1.67067	1.67067	SEL 24h up vs Untr
GPER	7.39325e-06	1.6668	1.6668	SEL 24h up vs Untr
RBM3	4.44237e-05	1.65982	1.65982	SEL 24h up vs Untr
TEX261	1.29876e-05	1.65616	1.65616	SEL 24h up vs Untr
NOL9	0.000107371	1.65467	1.65467	SEL 24h up vs Untr
CHAC2	5.61304e-05	1.65138	1.65138	SEL 24h up vs Untr
ZSWIM5	0.000546432	1.64975	1.64975	SEL 24h up vs Untr
ACP2	0.000259816	1.64293	1.64293	SEL 24h up vs Untr
C12orf5	0.000190166	1.63736	1.63736	SEL 24h up vs Untr
PIK3R3	0.000634391	1.63715	1.63715	SEL 24h up vs Untr
FAM57A	0.000317339	1.63333	1.63333	SEL 24h up vs Untr
NOV	0.000102254	1.63127	1.63127	SEL 24h up vs Untr
C19orf24	0.000430919	1.62747	1.62747	SEL 24h up vs Untr
WDR73	0.000455015	1.62744	1.62744	SEL 24h up vs Untr
GBA	1.79044e-05	1.62579	1.62579	SEL 24h up vs Untr
ENOX2	2.33459e-05	1.62474	1.62474	SEL 24h up vs Untr
MBNL3	2.05101e-05	1.6222	1.6222	SEL 24h up vs Untr
DDX49	0.00065321	1.61992	1.61992	SEL 24h up vs Untr
TCTA	8.48796e-05	1.6183	1.6183	SEL 24h up vs Untr
CLPTM1	2.43569e-05	1.61747	1.61747	SEL 24h up vs Untr
TP53I3	0.000166996	1.61691	1.61691	SEL 24h up vs Untr
EFCAB2	0.00066422	1.61417	1.61417	SEL 24h up vs Untr
PNPO	1.9771e-05	1.60905	1.60905	SEL 24h up vs Untr
LRRFIP1	0.00033437	1.607	1.607	SEL 24h up vs Untr
GPR137	2.02602e-05	1.60308	1.60308	SEL 24h up vs Untr
ODC1	4.37097e-05	1.59858	1.59858	SEL 24h up vs Untr
ALG13	1.53478e-05	1.59629	1.59629	SEL 24h up vs Untr
PRMT6	7.75019e-07	1.59059	1.59059	SEL 24h up vs Untr
SLC6A8	0.000337135	1.58962	1.58962	SEL 24h up vs Untr
SLC6A8	0.000449141	1.58434	1.58434	SEL 24h up vs Untr
TMEM199	0.000338145	1.58181	1.58181	SEL 24h up vs Untr
ZFAND2A	6.19227e-05	1.57522	1.57522	SEL 24h up vs Untr
SNORA70	0.00119232	1.5722	1.5722	SEL 24h up vs Untr
THAP10	0.000264036	1.57047	1.57047	SEL 24h up vs Untr
CIRH1A	8.2961e-06	1.56794	1.56794	SEL 24h up vs Untr
CARS2	0.000610553	1.56524	1.56524	SEL 24h up vs Untr
ZNF673	0.00017229	1.56317	1.56317	SEL 24h up vs Untr
PNO1	6.92762e-05	1.56299	1.56299	SEL 24h up vs Untr
F8A1	2.7532e-05	1.56248	1.56248	SEL 24h up vs Untr
F8A1	3.52996e-05	1.55881	1.55881	SEL 24h up vs Untr
BCS1L	0.0012649	1.55446	1.55446	SEL 24h up vs Untr
CYB5D1	1.31781e-05	1.55239	1.55239	SEL 24h up vs Untr
SLC25A46	3.97516e-06	1.55168	1.55168	SEL 24h up vs Untr
CCDC86	0.00160688	1.55164	1.55164	SEL 24h up vs Untr
PGAP2	3.85462e-05	1.55107	1.55107	SEL 24h up vs Untr
SPPL2A	3.53266e-05	1.54194	1.54194	SEL 24h up vs Untr
ZRSR1	0.00126375	1.54001	1.54001	SEL 24h up vs Untr
DCP1B	0.000533315	1.5342	1.5342	SEL 24h up vs Untr
TOE1	0.00077307	1.53057	1.53057	SEL 24h up vs Untr
MRPL49	0.000654447	1.53011	1.53011	SEL 24h up vs Untr
WDR77	0.000211745	1.5295	1.5295	SEL 24h up vs Untr
EMR2	0.000449995	1.52922	1.52922	SEL 24h up vs Untr
FXN	8.08456e-06	1.52736	1.52736	SEL 24h up vs Untr
AGT	0.000508543	1.52723	1.52723	SEL 24h up vs Untr
PLRG1	9.13917e-05	1.52071	1.52071	SEL 24h up vs Untr
DUSP12	0.000322085	1.5201	1.5201	SEL 24h up vs Untr
C16orf47	2.83789e-05	1.51591	1.51591	SEL 24h up vs Untr
G6PC3	0.000144518	1.51108	1.51108	SEL 24h up vs Untr
ABHD16A	0.000864091	1.51044	1.51044	SEL 24h up vs Untr
F8A1	5.41499e-05	1.51001	1.51001	SEL 24h up vs Untr
PMEPA1	9.28448e-06	1.5095	1.5095	SEL 24h up vs Untr
UMPS	0.000490756	1.50874	1.50874	SEL 24h up vs Untr
SRD5A3	9.36306e-05	1.50453	1.50453	SEL 24h up vs Untr
AKT1S1	0.00012168	1.50428	1.50428	SEL 24h up vs Untr
RAP1GDS1	0.000251548	1.50133	1.50133	SEL 24h up vs Untr
ABHD16A	0.00116022	1.50109	1.50109	SEL 24h up vs Untr
TTPAL	0.00101317	1.49966	1.49966	SEL 24h up vs Untr
CSTF2	9.30284e-05	1.49949	1.49949	SEL 24h up vs Untr
OASL	0.000400413	1.49541	1.49541	SEL 24h up vs Untr
ATP6V0D1	0.000458513	1.4948	1.4948	SEL 24h up vs Untr
TCEB3	0.000234988	1.49385	1.49385	SEL 24h up vs Untr
RNF187	0.000332972	1.49377	1.49377	SEL 24h up vs Untr
PDSS1	0.00112163	1.4922	1.4922	SEL 24h up vs Untr
ERVK3-1	0.00163011	1.49141	1.49141	SEL 24h up vs Untr
FAM81A	0.000627994	1.49128	1.49128	SEL 24h up vs Untr
CXorf40B	0.00113825	1.4903	1.4903	SEL 24h up vs Untr
ELOVL1	0.000246577	1.488	1.488	SEL 24h up vs Untr
CD97	0.000915796	1.48753	1.48753	SEL 24h up vs Untr
S100A16	0.0016376	1.48753	1.48753	SEL 24h up vs Untr
NIP7	0.000137983	1.48729	1.48729	SEL 24h up vs Untr
LPCAT2	0.000346506	1.48445	1.48445	SEL 24h up vs Untr
LOC648987	0.00110777	1.48289	1.48289	SEL 24h up vs Untr
PSMC4	0.000197109	1.48202	1.48202	SEL 24h up vs Untr
CMTM7	0.000526749	1.48134	1.48134	SEL 24h up vs Untr
RIOK2	9.73819e-06	1.47659	1.47659	SEL 24h up vs Untr
TTC1	0.00149542	1.47633	1.47633	SEL 24h up vs Untr
TP53	0.000159773	1.47602	1.47602	SEL 24h up vs Untr
FTSJ1	0.000563094	1.47372	1.47372	SEL 24h up vs Untr
ADRM1	0.000773589	1.47318	1.47318	SEL 24h up vs Untr
PCGF6	0.000585101	1.47299	1.47299	SEL 24h up vs Untr
SLC35B1	7.15818e-05	1.4702	1.4702	SEL 24h up vs Untr
AP5M1	2.35691e-05	1.47005	1.47005	SEL 24h up vs Untr
FAM136A	0.000327606	1.46922	1.46922	SEL 24h up vs Untr
ADSL	0.00054173	1.46865	1.46865	SEL 24h up vs Untr
CISD2	0.00132237	1.46723	1.46723	SEL 24h up vs Untr
POMT2	9.6723e-05	1.46564	1.46564	SEL 24h up vs Untr
PRMT5	1.41112e-05	1.46362	1.46362	SEL 24h up vs Untr
GSK3A	7.03584e-05	1.46233	1.46233	SEL 24h up vs Untr
ELOF1	0.000733148	1.46126	1.46126	SEL 24h up vs Untr
FAM120AOS	6.42277e-05	1.4603	1.4603	SEL 24h up vs Untr
MYD88	3.76192e-05	1.45899	1.45899	SEL 24h up vs Untr
RBM23	0.00136033	1.45761	1.45761	SEL 24h up vs Untr
UCHL3	0.000158657	1.45732	1.45732	SEL 24h up vs Untr
THOC6	0.00132163	1.45518	1.45518	SEL 24h up vs Untr
SLC9B2	6.53554e-05	1.45514	1.45514	SEL 24h up vs Untr
MGC72080	6.4244e-05	1.45303	1.45303	SEL 24h up vs Untr
MGC72080	6.75314e-05	1.45246	1.45246	SEL 24h up vs Untr
PRPF38A	0.000128578	1.45144	1.45144	SEL 24h up vs Untr
KGFLP1	0.000365954	1.44741	1.44741	SEL 24h up vs Untr
EMC10	0.00147156	1.44656	1.44656	SEL 24h up vs Untr
MGC72080	5.69261e-05	1.44498	1.44498	SEL 24h up vs Untr
PPEF1	0.000824514	1.44433	1.44433	SEL 24h up vs Untr
CLEC2B	0.000424926	1.43943	1.43943	SEL 24h up vs Untr
C14orf101	3.26427e-05	1.43726	1.43726	SEL 24h up vs Untr
ST7	3.01944e-05	1.43693	1.43693	SEL 24h up vs Untr
TMEM43	0.00135437	1.43574	1.43574	SEL 24h up vs Untr
PEMT	0.00131014	1.43528	1.43528	SEL 24h up vs Untr
CD58	0.000951203	1.4346	1.4346	SEL 24h up vs Untr
FUNDC2	0.000478988	1.43415	1.43415	SEL 24h up vs Untr
TET2	0.00120205	1.43298	1.43298	SEL 24h up vs Untr
PLP2	0.000178716	1.43137	1.43137	SEL 24h up vs Untr
MCOLN1	3.89866e-05	1.43126	1.43126	SEL 24h up vs Untr
UTP14A	8.33034e-05	1.4305	1.4305	SEL 24h up vs Untr
UBE2Z	1.51108e-05	1.43	1.43	SEL 24h up vs Untr
PRR3	0.0013611	1.42739	1.42739	SEL 24h up vs Untr
TRAM2	0.000126243	1.42724	1.42724	SEL 24h up vs Untr
NXT2	0.000718974	1.42719	1.42719	SEL 24h up vs Untr
PPP4R1	5.75895e-06	1.42718	1.42718	SEL 24h up vs Untr
LCMT2	0.00104801	1.42492	1.42492	SEL 24h up vs Untr
LIF	0.000295415	1.42391	1.42391	SEL 24h up vs Untr
SKA3	2.19545e-05	1.42358	1.42358	SEL 24h up vs Untr
HNRNPM	0.000636526	1.42161	1.42161	SEL 24h up vs Untr
ELF1	1.25622e-05	1.42154	1.42154	SEL 24h up vs Untr
MSL3	0.000405364	1.42114	1.42114	SEL 24h up vs Untr
ICK	0.00020015	1.42034	1.42034	SEL 24h up vs Untr
GLYR1	1.29787e-06	1.4201	1.4201	SEL 24h up vs Untr
MGC72080	0.000239142	1.41809	1.41809	SEL 24h up vs Untr
MKNK2	0.0013148	1.41698	1.41698	SEL 24h up vs Untr
LOC284751	0.000299205	1.41619	1.41619	SEL 24h up vs Untr
TXNL1	3.67216e-06	1.41603	1.41603	SEL 24h up vs Untr
PCYT1A	0.000126997	1.41576	1.41576	SEL 24h up vs Untr
B3GALTL	0.00100215	1.41523	1.41523	SEL 24h up vs Untr
ANAPC13	0.00069	1.41345	1.41345	SEL 24h up vs Untr
MGC72080	0.000153183	1.41343	1.41343	SEL 24h up vs Untr
PSMD11	0.000118706	1.41314	1.41314	SEL 24h up vs Untr
CXorf26	0.00154432	1.41296	1.41296	SEL 24h up vs Untr
NFKBIB	0.000238285	1.41174	1.41174	SEL 24h up vs Untr
MGC72080	6.22451e-05	1.41047	1.41047	SEL 24h up vs Untr
TBC1D13	0.000877018	1.41015	1.41015	SEL 24h up vs Untr
JMJD8	0.000406991	1.4095	1.4095	SEL 24h up vs Untr
SRSF8	0.0002409	1.40838	1.40838	SEL 24h up vs Untr
SLC35E3	2.9399e-05	1.40708	1.40708	SEL 24h up vs Untr
GPS2	0.000461295	1.40636	1.40636	SEL 24h up vs Untr
STAT6	0.00141608	1.40547	1.40547	SEL 24h up vs Untr
PDPK1	0.000688028	1.40477	1.40477	SEL 24h up vs Untr
MLX	0.000182022	1.40354	1.40354	SEL 24h up vs Untr
MLKL	0.000470704	1.40332	1.40332	SEL 24h up vs Untr
NINJ2	0.00129007	1.40304	1.40304	SEL 24h up vs Untr
PIGB	5.29827e-06	1.40295	1.40295	SEL 24h up vs Untr
UBXN2B	0.000109071	1.40111	1.40111	SEL 24h up vs Untr
MGC72080	0.000496486	1.40093	1.40093	SEL 24h up vs Untr
MGC72080	9.22778e-05	1.40079	1.40079	SEL 24h up vs Untr
ZDHHC16	0.00101662	1.39972	1.39972	SEL 24h up vs Untr
KCTD14	0.00119233	1.39898	1.39898	SEL 24h up vs Untr
C2orf18	0.00019802	1.39774	1.39774	SEL 24h up vs Untr
ECHDC1	8.65187e-05	1.39606	1.39606	SEL 24h up vs Untr
TMEM104	0.0014684	1.39463	1.39463	SEL 24h up vs Untr
UBE2Q1	0.000586807	1.39454	1.39454	SEL 24h up vs Untr
FBXL3	0.000145684	1.39426	1.39426	SEL 24h up vs Untr
UBXN8	0.000799085	1.39264	1.39264	SEL 24h up vs Untr
DYNC1LI1	0.000705655	1.39214	1.39214	SEL 24h up vs Untr
TRIB3	0.000582265	1.39163	1.39163	SEL 24h up vs Untr
MEA1	6.93924e-05	1.39135	1.39135	SEL 24h up vs Untr
FAM82A2	0.000134254	1.38904	1.38904	SEL 24h up vs Untr
MGC72080	0.000166618	1.38899	1.38899	SEL 24h up vs Untr
RRN3P2	0.00111052	1.38829	1.38829	SEL 24h up vs Untr
RPS26	0.00158004	1.38592	1.38592	SEL 24h up vs Untr
TRIP6	0.00129757	1.38562	1.38562	SEL 24h up vs Untr
RRN3P2	0.00070273	1.38529	1.38529	SEL 24h up vs Untr
MAP3K2	0.000883534	1.38475	1.38475	SEL 24h up vs Untr
CD44	6.58358e-05	1.38474	1.38474	SEL 24h up vs Untr
TMEM185B	0.000631188	1.38466	1.38466	SEL 24h up vs Untr
SKA1	0.00154366	1.38408	1.38408	SEL 24h up vs Untr
TRAK2	0.000479624	1.38369	1.38369	SEL 24h up vs Untr
NXF1	0.000485863	1.38298	1.38298	SEL 24h up vs Untr
RPF2	0.000754912	1.38189	1.38189	SEL 24h up vs Untr
CSTF3	0.000907917	1.3808	1.3808	SEL 24h up vs Untr
PTDSS1	0.000333953	1.38076	1.38076	SEL 24h up vs Untr
PBRM1	0.00144248	1.38058	1.38058	SEL 24h up vs Untr
LRRC61	0.00140436	1.38049	1.38049	SEL 24h up vs Untr
IRX3	3.97218e-06	1.38015	1.38015	SEL 24h up vs Untr
MSH3	0.00103731	1.37963	1.37963	SEL 24h up vs Untr
MUL1	0.00077948	1.379	1.379	SEL 24h up vs Untr
DLEU1	7.88621e-05	1.37847	1.37847	SEL 24h up vs Untr
COPS3	3.75937e-06	1.37804	1.37804	SEL 24h up vs Untr
VPS37B	0.00138998	1.37786	1.37786	SEL 24h up vs Untr
FAM27E3	0.00154526	1.37757	1.37757	SEL 24h up vs Untr
BRI3BP	0.000415706	1.37714	1.37714	SEL 24h up vs Untr
SLC9A6	6.79138e-05	1.37621	1.37621	SEL 24h up vs Untr
RBBP9	0.00131507	1.37618	1.37618	SEL 24h up vs Untr
FAM122A	0.00033622	1.37607	1.37607	SEL 24h up vs Untr
ARHGAP1	0.00014108	1.37508	1.37508	SEL 24h up vs Untr
RAD17	2.52044e-05	1.37485	1.37485	SEL 24h up vs Untr
CMAS	0.000521493	1.37074	1.37074	SEL 24h up vs Untr
UFD1L	0.000179492	1.36906	1.36906	SEL 24h up vs Untr
NKIRAS2	0.000198073	1.36841	1.36841	SEL 24h up vs Untr
PSME3	0.000832075	1.36785	1.36785	SEL 24h up vs Untr
SLC35E1	0.000677945	1.36656	1.36656	SEL 24h up vs Untr
TADA2B	0.000875276	1.36626	1.36626	SEL 24h up vs Untr
CDC16	0.000184718	1.36593	1.36593	SEL 24h up vs Untr
GPN2	0.00102269	1.36564	1.36564	SEL 24h up vs Untr
RABIF	0.00102563	1.36503	1.36503	SEL 24h up vs Untr
MFSD2A	0.000852799	1.36499	1.36499	SEL 24h up vs Untr
GTF3A	0.00123979	1.36424	1.36424	SEL 24h up vs Untr
EI24	6.72724e-06	1.36221	1.36221	SEL 24h up vs Untr
HCCS	5.90854e-05	1.36195	1.36195	SEL 24h up vs Untr
TIMM21	0.000358988	1.36081	1.36081	SEL 24h up vs Untr
TSPAN3	1.95857e-06	1.36045	1.36045	SEL 24h up vs Untr
TM4SF19	5.20997e-05	1.3595	1.3595	SEL 24h up vs Untr
C19orf12	0.000180853	1.35933	1.35933	SEL 24h up vs Untr
TMEM9B	0.000213024	1.35913	1.35913	SEL 24h up vs Untr
ICMT	0.000558172	1.35803	1.35803	SEL 24h up vs Untr
SPOP	0.000935133	1.35729	1.35729	SEL 24h up vs Untr
SLC35A4	0.000167533	1.35627	1.35627	SEL 24h up vs Untr
STK17A	0.000409539	1.35612	1.35612	SEL 24h up vs Untr
NOL10	0.00111794	1.35592	1.35592	SEL 24h up vs Untr
AKT2	0.000267045	1.35555	1.35555	SEL 24h up vs Untr
CDC42EP1	0.000934605	1.354	1.354	SEL 24h up vs Untr
PPP1R11	1.58749e-05	1.35362	1.35362	SEL 24h up vs Untr
PPP1R11	1.58749e-05	1.35362	1.35362	SEL 24h up vs Untr
LSM1	0.000916394	1.35359	1.35359	SEL 24h up vs Untr
TMEM79	0.000345552	1.35292	1.35292	SEL 24h up vs Untr
SLC6A9	0.00135831	1.35068	1.35068	SEL 24h up vs Untr
HSPA14	0.00074339	1.34679	1.34679	SEL 24h up vs Untr
JTB	0.000402	1.34622	1.34622	SEL 24h up vs Untr
LAMTOR1	0.000355143	1.34617	1.34617	SEL 24h up vs Untr
RAD17	5.05783e-05	1.34599	1.34599	SEL 24h up vs Untr
ANAPC7	0.000296419	1.34575	1.34575	SEL 24h up vs Untr
TNFRSF10A	0.000930919	1.34569	1.34569	SEL 24h up vs Untr
DDX39B	0.000723587	1.34524	1.34524	SEL 24h up vs Untr
TIMMDC1	0.000999951	1.34487	1.34487	SEL 24h up vs Untr
GNG5	0.000719158	1.34485	1.34485	SEL 24h up vs Untr
OSMR	0.00133617	1.34446	1.34446	SEL 24h up vs Untr
GTPBP10	0.00162034	1.34382	1.34382	SEL 24h up vs Untr
SLC25A32	7.46297e-05	1.34344	1.34344	SEL 24h up vs Untr
PSMC1	0.000428996	1.34277	1.34277	SEL 24h up vs Untr
C1orf85	0.000678225	1.34056	1.34056	SEL 24h up vs Untr
SUV39H2	0.00018608	1.34029	1.34029	SEL 24h up vs Untr
PPM1D	4.3735e-07	1.33851	1.33851	SEL 24h up vs Untr
DDX39B	0.000759884	1.33814	1.33814	SEL 24h up vs Untr
CTNS	0.000450894	1.33801	1.33801	SEL 24h up vs Untr
NSF	4.36689e-05	1.33695	1.33695	SEL 24h up vs Untr
EHF	0.000393864	1.33639	1.33639	SEL 24h up vs Untr
TLR3	0.000961691	1.33601	1.33601	SEL 24h up vs Untr
ATP5J	0.000259717	1.33547	1.33547	SEL 24h up vs Untr
PPP1R8	0.00129503	1.33539	1.33539	SEL 24h up vs Untr
ARSB	0.00039621	1.3351	1.3351	SEL 24h up vs Untr
ALX1	0.000479695	1.33494	1.33494	SEL 24h up vs Untr
FKBP15	0.00140474	1.33458	1.33458	SEL 24h up vs Untr
MRPS11	0.00125883	1.33377	1.33377	SEL 24h up vs Untr
M6PR	1.6487e-05	1.33009	1.33009	SEL 24h up vs Untr
PSMC1	0.000506127	1.3299	1.3299	SEL 24h up vs Untr
AATF	0.00105533	1.32894	1.32894	SEL 24h up vs Untr
TXNDC15	0.000241466	1.32881	1.32881	SEL 24h up vs Untr
RNASEH2B	0.00011578	1.32832	1.32832	SEL 24h up vs Untr
HOXC10	0.00142711	1.32754	1.32754	SEL 24h up vs Untr
ATP6V1C1	0.000562621	1.32748	1.32748	SEL 24h up vs Untr
RB1	0.000886511	1.32649	1.32649	SEL 24h up vs Untr
CCDC47	0.000220708	1.32643	1.32643	SEL 24h up vs Untr
SLC36A4	0.00014792	1.32595	1.32595	SEL 24h up vs Untr
SYNCRIP	0.000463396	1.32541	1.32541	SEL 24h up vs Untr
CNOT10	0.000592218	1.32513	1.32513	SEL 24h up vs Untr
DIEXF	0.000159078	1.32483	1.32483	SEL 24h up vs Untr
MRPS35	0.000331511	1.3241	1.3241	SEL 24h up vs Untr
NIPA2	0.000953404	1.32395	1.32395	SEL 24h up vs Untr
SUPT4H1	9.90441e-05	1.32339	1.32339	SEL 24h up vs Untr
TOMM34	0.000217097	1.32334	1.32334	SEL 24h up vs Untr
TMX1	8.96877e-05	1.32258	1.32258	SEL 24h up vs Untr
MMACHC	0.000824114	1.32157	1.32157	SEL 24h up vs Untr
PDGFRB	0.000711943	1.32056	1.32056	SEL 24h up vs Untr
RPP30	0.000659767	1.31829	1.31829	SEL 24h up vs Untr
CASP3	0.000253863	1.31803	1.31803	SEL 24h up vs Untr
ZHX1	8.44314e-05	1.31783	1.31783	SEL 24h up vs Untr
DDX39B	0.00131219	1.31777	1.31777	SEL 24h up vs Untr
DDX20	0.000209919	1.31762	1.31762	SEL 24h up vs Untr
PSMA4	0.000887108	1.31746	1.31746	SEL 24h up vs Untr
ORC5	0.000136572	1.31695	1.31695	SEL 24h up vs Untr
GTPBP8	0.00144727	1.31673	1.31673	SEL 24h up vs Untr
OR7E14P	0.000712555	1.31589	1.31589	SEL 24h up vs Untr
OGFOD1	0.000159784	1.3153	1.3153	SEL 24h up vs Untr
ISG20L2	0.000778885	1.31505	1.31505	SEL 24h up vs Untr
SUSD5	0.000131553	1.31395	1.31395	SEL 24h up vs Untr
SLC35C2	0.00134002	1.31347	1.31347	SEL 24h up vs Untr
CCDC75	0.000722289	1.31341	1.31341	SEL 24h up vs Untr
SLC20A2	0.000332434	1.31306	1.31306	SEL 24h up vs Untr
DNAJC25-GNG10	2.44122e-05	1.31228	1.31228	SEL 24h up vs Untr
DESI1	0.00102681	1.31124	1.31124	SEL 24h up vs Untr
ZNF319	0.000350209	1.31085	1.31085	SEL 24h up vs Untr
PPT2-EGFL8	1.72667e-05	1.30998	1.30998	SEL 24h up vs Untr
MGC72080	0.00072153	1.30829	1.30829	SEL 24h up vs Untr
LRRC49	0.00103186	1.30825	1.30825	SEL 24h up vs Untr
PRR4	0.00096457	1.30776	1.30776	SEL 24h up vs Untr
TRMT6	0.000773099	1.30746	1.30746	SEL 24h up vs Untr
PGAM1	0.0002216	1.30685	1.30685	SEL 24h up vs Untr
ZNF707	0.001605	1.30605	1.30605	SEL 24h up vs Untr
JMJD4	0.000888848	1.30582	1.30582	SEL 24h up vs Untr
TESK1	0.000856179	1.30566	1.30566	SEL 24h up vs Untr
MDM2	0.000146857	1.30506	1.30506	SEL 24h up vs Untr
PGAM1	0.000212774	1.30479	1.30479	SEL 24h up vs Untr
TEX10	0.000720103	1.30117	1.30117	SEL 24h up vs Untr
ZMPSTE24	0.000782179	1.30113	1.30113	SEL 24h up vs Untr
TOR2A	0.000815179	1.30021	1.30021	SEL 24h up vs Untr
THEM4	0.000444624	1.29989	1.29989	SEL 24h up vs Untr
NSRP1	0.00132753	1.29877	1.29877	SEL 24h up vs Untr
TMEM144	0.000440636	1.2971	1.2971	SEL 24h up vs Untr
RNF14	2.06734e-05	1.2957	1.2957	SEL 24h up vs Untr
AASDHPPT	0.000136484	1.2951	1.2951	SEL 24h up vs Untr
ARL6IP5	9.14441e-05	1.2941	1.2941	SEL 24h up vs Untr
MRRF	0.000463607	1.29359	1.29359	SEL 24h up vs Untr
TMEM180	0.000265947	1.29351	1.29351	SEL 24h up vs Untr
SLCO4A1	0.000237592	1.28871	1.28871	SEL 24h up vs Untr
ST7L	0.000882215	1.28858	1.28858	SEL 24h up vs Untr
GLE1	0.000179308	1.28823	1.28823	SEL 24h up vs Untr
ARL8B	0.00152468	1.28802	1.28802	SEL 24h up vs Untr
C11orf24	0.000759104	1.28545	1.28545	SEL 24h up vs Untr
C12orf45	0.000118814	1.2843	1.2843	SEL 24h up vs Untr
PGAM1	0.000229314	1.28421	1.28421	SEL 24h up vs Untr
NABP2	0.000541759	1.28413	1.28413	SEL 24h up vs Untr
CTBP1-AS1	0.000730093	1.28405	1.28405	SEL 24h up vs Untr
MRPL9	0.000150617	1.28347	1.28347	SEL 24h up vs Untr
DPM1	0.000822881	1.28293	1.28293	SEL 24h up vs Untr
SLC12A8	0.000776574	1.28289	1.28289	SEL 24h up vs Untr
TOR1A	0.00129877	1.28213	1.28213	SEL 24h up vs Untr
CHAMP1	0.00102346	1.28141	1.28141	SEL 24h up vs Untr
DNAAF3	0.000138299	1.2806	1.2806	SEL 24h up vs Untr
PARP6	0.000292001	1.2804	1.2804	SEL 24h up vs Untr
SLC25A38	0.00102695	1.27901	1.27901	SEL 24h up vs Untr
WDR5	4.391e-05	1.27872	1.27872	SEL 24h up vs Untr
DERL2	0.00121658	1.278	1.278	SEL 24h up vs Untr
TBK1	0.000770177	1.27756	1.27756	SEL 24h up vs Untr
MRPL46	0.000511977	1.27411	1.27411	SEL 24h up vs Untr
TP53RK	7.78649e-06	1.27311	1.27311	SEL 24h up vs Untr
PSMF1	0.000642713	1.27252	1.27252	SEL 24h up vs Untr
EIF2B1	0.000345144	1.27251	1.27251	SEL 24h up vs Untr
USP15	0.000725929	1.27236	1.27236	SEL 24h up vs Untr
RELA	0.000386864	1.27155	1.27155	SEL 24h up vs Untr
ZNF664	0.000148145	1.27137	1.27137	SEL 24h up vs Untr
TTLL12	0.00148825	1.27018	1.27018	SEL 24h up vs Untr
SLC39A6	0.000596841	1.26977	1.26977	SEL 24h up vs Untr
YRDC	0.000185555	1.26903	1.26903	SEL 24h up vs Untr
C9orf78	9.30956e-05	1.26895	1.26895	SEL 24h up vs Untr
ZDHHC13	0.00117263	1.26814	1.26814	SEL 24h up vs Untr
ZFR	0.000183764	1.2675	1.2675	SEL 24h up vs Untr
ABHD5	0.000202314	1.26723	1.26723	SEL 24h up vs Untr
HDAC3	0.00124394	1.26687	1.26687	SEL 24h up vs Untr
CNOT7	0.000414068	1.26677	1.26677	SEL 24h up vs Untr
UBE2G1	0.0010397	1.2666	1.2666	SEL 24h up vs Untr
USP21	0.00161835	1.26649	1.26649	SEL 24h up vs Untr
DCTD	0.00050985	1.26594	1.26594	SEL 24h up vs Untr
FARSB	0.0002285	1.26561	1.26561	SEL 24h up vs Untr
IFT52	0.00155727	1.26377	1.26377	SEL 24h up vs Untr
PSMD14	9.95283e-05	1.26269	1.26269	SEL 24h up vs Untr
EIF4EBP2	0.000625525	1.26256	1.26256	SEL 24h up vs Untr
PLAA	6.6125e-06	1.26051	1.26051	SEL 24h up vs Untr
LOC653566	0.000146856	1.26049	1.26049	SEL 24h up vs Untr
PSMB1	0.000120146	1.25898	1.25898	SEL 24h up vs Untr
SELT	0.00120394	1.25863	1.25863	SEL 24h up vs Untr
DDX19A	0.000989397	1.25809	1.25809	SEL 24h up vs Untr
PSMB2	0.00124454	1.25806	1.25806	SEL 24h up vs Untr
ZNF180	0.00163564	1.25767	1.25767	SEL 24h up vs Untr
RXRA	0.00158211	1.25668	1.25668	SEL 24h up vs Untr
STRAP	0.000183472	1.25647	1.25647	SEL 24h up vs Untr
SAAL1	0.000608596	1.25555	1.25555	SEL 24h up vs Untr
UFC1	9.70084e-06	1.25506	1.25506	SEL 24h up vs Untr
ZNF747	0.00155184	1.2549	1.2549	SEL 24h up vs Untr
TPM3P9	0.00038151	1.25484	1.25484	SEL 24h up vs Untr
PRMT3	0.000929742	1.25436	1.25436	SEL 24h up vs Untr
TPP2	0.000535102	1.25218	1.25218	SEL 24h up vs Untr
PTPRR	0.000527111	1.2516	1.2516	SEL 24h up vs Untr
LOC653566	0.000117885	1.24949	1.24949	SEL 24h up vs Untr
IDH3A	8.65256e-05	1.24904	1.24904	SEL 24h up vs Untr
ZBTB7B	0.000653416	1.24842	1.24842	SEL 24h up vs Untr
SNX3	0.000426419	1.24759	1.24759	SEL 24h up vs Untr
C5orf34	0.000204647	1.24719	1.24719	SEL 24h up vs Untr
C20orf4	0.00125041	1.24715	1.24715	SEL 24h up vs Untr
OXTR	0.000657601	1.2467	1.2467	SEL 24h up vs Untr
PWP1	3.08361e-05	1.24627	1.24627	SEL 24h up vs Untr
CAPZA1	1.10371e-05	1.24494	1.24494	SEL 24h up vs Untr
TXN2	0.00015197	1.24429	1.24429	SEL 24h up vs Untr
TJAP1	0.000162889	1.24282	1.24282	SEL 24h up vs Untr
C17orf97	0.000410764	1.24276	1.24276	SEL 24h up vs Untr
VRK2	0.00117999	1.24239	1.24239	SEL 24h up vs Untr
SUPV3L1	0.000163894	1.24144	1.24144	SEL 24h up vs Untr
ISCA1	0.000778703	1.23998	1.23998	SEL 24h up vs Untr
ATP6V1B2	0.0012263	1.23952	1.23952	SEL 24h up vs Untr
RPRD2	0.0012974	1.23892	1.23892	SEL 24h up vs Untr
ETV6	6.72433e-05	1.2385	1.2385	SEL 24h up vs Untr
SAYSD1	0.000889563	1.23672	1.23672	SEL 24h up vs Untr
AMACR	0.00154208	1.23614	1.23614	SEL 24h up vs Untr
VDAC3	0.000920068	1.23452	1.23452	SEL 24h up vs Untr
HS6ST2	0.000182187	1.23252	1.23252	SEL 24h up vs Untr
PGAM1	0.00030911	1.23237	1.23237	SEL 24h up vs Untr
PGAM1	0.00030911	1.23237	1.23237	SEL 24h up vs Untr
CERS2	0.000588491	1.23183	1.23183	SEL 24h up vs Untr
PROSC	0.00122581	1.23061	1.23061	SEL 24h up vs Untr
ACTL6A	0.000263557	1.22964	1.22964	SEL 24h up vs Untr
SET	0.000414618	1.22408	1.22408	SEL 24h up vs Untr
PSMC2	0.00136171	1.22074	1.22074	SEL 24h up vs Untr
KMO	0.000872019	1.22023	1.22023	SEL 24h up vs Untr
NSUN4	0.00147452	1.21891	1.21891	SEL 24h up vs Untr
MAPK7	0.000180546	1.21816	1.21816	SEL 24h up vs Untr
ATP6V0E1	0.000230096	1.21589	1.21589	SEL 24h up vs Untr
ZNF384	0.000979072	1.21539	1.21539	SEL 24h up vs Untr
LSR	0.000414848	1.2146	1.2146	SEL 24h up vs Untr
MLH1	0.001209	1.21428	1.21428	SEL 24h up vs Untr
ZBTB45	0.000757644	1.21316	1.21316	SEL 24h up vs Untr
CHRAC1	0.00125688	1.21277	1.21277	SEL 24h up vs Untr
SF3A3	0.000641426	1.21156	1.21156	SEL 24h up vs Untr
REEP5	0.000522575	1.21124	1.21124	SEL 24h up vs Untr
TRMT10C	0.00134641	1.20942	1.20942	SEL 24h up vs Untr
BLZF1	0.00136894	1.20869	1.20869	SEL 24h up vs Untr
YKT6	0.000738392	1.20836	1.20836	SEL 24h up vs Untr
UBA5	0.000901767	1.20746	1.20746	SEL 24h up vs Untr
MCCC2	0.00036915	1.20678	1.20678	SEL 24h up vs Untr
MCCC2	0.00036915	1.20678	1.20678	SEL 24h up vs Untr
OR7E5P	4.60708e-05	1.20571	1.20571	SEL 24h up vs Untr
EIF5AL1	0.00163794	1.20476	1.20476	SEL 24h up vs Untr
CHEK1	0.00060494	1.20421	1.20421	SEL 24h up vs Untr
TTC28-AS1	0.000566765	1.20374	1.20374	SEL 24h up vs Untr
SIX2	0.000843669	1.20344	1.20344	SEL 24h up vs Untr
WNT9A	0.000778444	1.20324	1.20324	SEL 24h up vs Untr
TSEN54	0.000284325	1.2029	1.2029	SEL 24h up vs Untr
LDHA	0.00106916	1.20238	1.20238	SEL 24h up vs Untr
METTL8	0.000343281	1.20186	1.20186	SEL 24h up vs Untr
ATP6V0A2	0.000759047	1.20039	1.20039	SEL 24h up vs Untr
THUMPD3	0.0014214	1.19986	1.19986	SEL 24h up vs Untr
ATG3	0.00117654	1.19982	1.19982	SEL 24h up vs Untr
SLC2A8	0.000856767	1.19938	1.19938	SEL 24h up vs Untr
RTCA	0.000565629	1.19835	1.19835	SEL 24h up vs Untr
PAICS	0.000442013	1.19805	1.19805	SEL 24h up vs Untr
RPE	0.000610078	1.19718	1.19718	SEL 24h up vs Untr
KPNA1	0.00091797	1.19653	1.19653	SEL 24h up vs Untr
SEPHS1P1	0.00143334	1.19632	1.19632	SEL 24h up vs Untr
MAFIP	0.000417588	1.19625	1.19625	SEL 24h up vs Untr
AMPD3	0.000489324	1.19603	1.19603	SEL 24h up vs Untr
MBD2	0.000195403	1.19498	1.19498	SEL 24h up vs Untr
RAB14	7.91703e-05	1.19004	1.19004	SEL 24h up vs Untr
PHLDA3	0.00163271	1.18683	1.18683	SEL 24h up vs Untr
TOLLIP	0.00116364	1.18674	1.18674	SEL 24h up vs Untr
TMEM62	0.00134638	1.18643	1.18643	SEL 24h up vs Untr
DCTN5	0.00153499	1.18461	1.18461	SEL 24h up vs Untr
MAFIP	0.000344052	1.18202	1.18202	SEL 24h up vs Untr
DPF2	0.00154279	1.18156	1.18156	SEL 24h up vs Untr
CERK	0.00126488	1.17912	1.17912	SEL 24h up vs Untr
ASUN	0.000695614	1.17606	1.17606	SEL 24h up vs Untr
TM9SF2	9.53158e-06	1.17593	1.17593	SEL 24h up vs Untr
LPGAT1	0.000557691	1.172	1.172	SEL 24h up vs Untr
VIM	0.00141703	1.17162	1.17162	SEL 24h up vs Untr
HNRNPK	2.60486e-05	1.17117	1.17117	SEL 24h up vs Untr
LINC00238	0.000240668	1.16726	1.16726	SEL 24h up vs Untr
PMS2	0.00108621	1.16365	1.16365	SEL 24h up vs Untr
LRRC17	0.000199615	1.16311	1.16311	SEL 24h up vs Untr
SSR1	0.000248324	1.16109	1.16109	SEL 24h up vs Untr
DSG2	0.000143787	1.15691	1.15691	SEL 24h up vs Untr
OGG1	0.0012229	1.15667	1.15667	SEL 24h up vs Untr
PGRMC1	0.000400111	1.15631	1.15631	SEL 24h up vs Untr
PTGDR	0.00106608	1.15405	1.15405	SEL 24h up vs Untr
RNF115	0.000746445	1.15203	1.15203	SEL 24h up vs Untr
TAF6L	0.00146356	1.14477	1.14477	SEL 24h up vs Untr
TM9SF3	0.00114422	1.14145	1.14145	SEL 24h up vs Untr
EYA1	0.00109083	1.14068	1.14068	SEL 24h up vs Untr
DDX1	0.000697327	1.14045	1.14045	SEL 24h up vs Untr
C2orf61	0.00016652	1.13884	1.13884	SEL 24h up vs Untr
MGRN1	0.000808698	1.13633	1.13633	SEL 24h up vs Untr
STRADA	0.000439957	1.13363	1.13363	SEL 24h up vs Untr
PYHIN1	0.000841923	1.13269	1.13269	SEL 24h up vs Untr
RQCD1	0.000997391	1.12888	1.12888	SEL 24h up vs Untr
SLC16A1	0.00049214	1.12865	1.12865	SEL 24h up vs Untr
CNGB1	0.000879165	1.12749	1.12749	SEL 24h up vs Untr
CR1	0.0010748	1.12323	1.12323	SEL 24h up vs Untr
RAB7A	0.000705532	1.12046	1.12046	SEL 24h up vs Untr
POMP	0.000521292	1.10609	1.10609	SEL 24h up vs Untr
FUT1	0.000243093	0.885711	-1.12904	SEL 24h down vs Untr
HELB	0.00129171	0.876515	-1.14088	SEL 24h down vs Untr
CDH1	0.000375565	0.875349	-1.1424	SEL 24h down vs Untr
SMA5	0.00163662	0.870284	-1.14905	SEL 24h down vs Untr
CALU	0.000554583	0.869784	-1.14971	SEL 24h down vs Untr
NINL	0.000952753	0.868486	-1.15143	SEL 24h down vs Untr
BUB1	8.03924e-05	0.867848	-1.15228	SEL 24h down vs Untr
AKAP5	0.000478024	0.864939	-1.15615	SEL 24h down vs Untr
CXorf38	0.00160688	0.860933	-1.16153	SEL 24h down vs Untr
GUSBP11	0.000474806	0.860932	-1.16153	SEL 24h down vs Untr
RPL36AL	0.000784474	0.86057	-1.16202	SEL 24h down vs Untr
ADAMTS8	0.000204406	0.857024	-1.16683	SEL 24h down vs Untr
C10orf10	0.00151865	0.854107	-1.17081	SEL 24h down vs Untr
GSR	0.00112009	0.852698	-1.17275	SEL 24h down vs Untr
DLGAP5	0.000614571	0.852479	-1.17305	SEL 24h down vs Untr
TTC21A	2.09124e-06	0.852086	-1.17359	SEL 24h down vs Untr
SALL4	0.00136193	0.85069	-1.17552	SEL 24h down vs Untr
MASTL	1.80165e-06	0.847963	-1.1793	SEL 24h down vs Untr
LOC100129726	0.00131771	0.845351	-1.18294	SEL 24h down vs Untr
B4GALNT4	0.000905366	0.843869	-1.18502	SEL 24h down vs Untr
ALG10	0.000280183	0.84309	-1.18611	SEL 24h down vs Untr
NCAPD3	0.000333868	0.839355	-1.19139	SEL 24h down vs Untr
ARL5B	0.000982301	0.839248	-1.19154	SEL 24h down vs Untr
CD46	0.000371116	0.839223	-1.19158	SEL 24h down vs Untr
CEP120	0.000266099	0.839224	-1.19158	SEL 24h down vs Untr
RALGPS1	0.00153165	0.837567	-1.19393	SEL 24h down vs Untr
ZNF226	0.000655843	0.835066	-1.19751	SEL 24h down vs Untr
MANF	0.00128547	0.834948	-1.19768	SEL 24h down vs Untr
FNDC3A	0.00113676	0.833209	-1.20018	SEL 24h down vs Untr
PHF10	0.000621363	0.832873	-1.20066	SEL 24h down vs Untr
BCO2	0.000119805	0.830965	-1.20342	SEL 24h down vs Untr
REEP3	3.61718e-05	0.830617	-1.20392	SEL 24h down vs Untr
IWS1	0.000386817	0.828858	-1.20648	SEL 24h down vs Untr
ALG10	0.000440696	0.828252	-1.20736	SEL 24h down vs Untr
STEAP4	5.15696e-05	0.826489	-1.20994	SEL 24h down vs Untr
GRIK2	0.00103897	0.825628	-1.2112	SEL 24h down vs Untr
LOC388152	0.00153962	0.825243	-1.21176	SEL 24h down vs Untr
N4BP2L2	2.30489e-05	0.82296	-1.21513	SEL 24h down vs Untr
FGD1	0.00131539	0.822505	-1.2158	SEL 24h down vs Untr
ANKRD27	0.000687718	0.822102	-1.21639	SEL 24h down vs Untr
PSIP1	0.00120529	0.821365	-1.21748	SEL 24h down vs Untr
MRC2	1.04101e-05	0.821233	-1.21768	SEL 24h down vs Untr
ROBO1	0.00156322	0.820986	-1.21805	SEL 24h down vs Untr
ZBED1	0.00149188	0.81994	-1.2196	SEL 24h down vs Untr
ZBED1	0.00149188	0.81994	-1.2196	SEL 24h down vs Untr
DNMT3B	0.00153956	0.818045	-1.22243	SEL 24h down vs Untr
PANK4	0.000293963	0.817819	-1.22276	SEL 24h down vs Untr
LOC401397	0.00156238	0.817576	-1.22313	SEL 24h down vs Untr
GOLGA8F	0.000305544	0.817569	-1.22314	SEL 24h down vs Untr
GOLGA8F	0.000305544	0.817569	-1.22314	SEL 24h down vs Untr
FLJ34690	0.000784777	0.816781	-1.22432	SEL 24h down vs Untr
DOCK1	0.0012754	0.816285	-1.22506	SEL 24h down vs Untr
PROZ	0.000187726	0.814341	-1.22799	SEL 24h down vs Untr
EXO1	0.00109021	0.814083	-1.22838	SEL 24h down vs Untr
TBC1D16	0.000537407	0.81325	-1.22963	SEL 24h down vs Untr
RPGR	0.00120158	0.812878	-1.2302	SEL 24h down vs Untr
MUT	0.000425589	0.812783	-1.23034	SEL 24h down vs Untr
SSR4P1	0.000867299	0.812705	-1.23046	SEL 24h down vs Untr
GOLGA8DP	0.000271688	0.812696	-1.23047	SEL 24h down vs Untr
LIN52	0.000944214	0.811864	-1.23173	SEL 24h down vs Untr
GAPVD1	0.000580516	0.811504	-1.23228	SEL 24h down vs Untr
KANK4	9.00033e-05	0.810865	-1.23325	SEL 24h down vs Untr
F7	0.000510979	0.810582	-1.23368	SEL 24h down vs Untr
FDFT1	0.000164686	0.809429	-1.23544	SEL 24h down vs Untr
AHRR	0.00135014	0.808393	-1.23702	SEL 24h down vs Untr
BCORL1	0.000403783	0.806223	-1.24035	SEL 24h down vs Untr
BTG3	0.0012896	0.804776	-1.24258	SEL 24h down vs Untr
MXD3	0.0013178	0.804206	-1.24346	SEL 24h down vs Untr
BTBD3	1.71385e-05	0.803841	-1.24403	SEL 24h down vs Untr
IFT140	0.00133879	0.803296	-1.24487	SEL 24h down vs Untr
MCF2L2	0.000408523	0.802226	-1.24653	SEL 24h down vs Untr
KIF21B	0.000557268	0.80187	-1.24708	SEL 24h down vs Untr
EXOC2	0.00160856	0.801297	-1.24798	SEL 24h down vs Untr
SYT7	3.28435e-06	0.801143	-1.24822	SEL 24h down vs Untr
TMEM41B	4.29693e-05	0.80093	-1.24855	SEL 24h down vs Untr
GPC1	0.00021587	0.800468	-1.24927	SEL 24h down vs Untr
SCARB2	0.000611736	0.800216	-1.24966	SEL 24h down vs Untr
COPB2	2.73787e-05	0.798339	-1.2526	SEL 24h down vs Untr
EDIL3	8.45502e-06	0.798264	-1.25272	SEL 24h down vs Untr
ATF7IP	3.45637e-05	0.798028	-1.25309	SEL 24h down vs Untr
IFFO2	0.00148416	0.797973	-1.25318	SEL 24h down vs Untr
ELOVL7	4.50429e-05	0.797827	-1.25341	SEL 24h down vs Untr
SDHAP2	0.00158243	0.797108	-1.25454	SEL 24h down vs Untr
MPPE1	0.000455713	0.796992	-1.25472	SEL 24h down vs Untr
MOCOS	0.000972839	0.796986	-1.25473	SEL 24h down vs Untr
SPIRE2	0.000298679	0.796863	-1.25492	SEL 24h down vs Untr
TRIM37	0.00113275	0.796528	-1.25545	SEL 24h down vs Untr
FHL2	4.64559e-05	0.79641	-1.25563	SEL 24h down vs Untr
TOP2A	0.000282115	0.795277	-1.25742	SEL 24h down vs Untr
FARP1	3.3091e-06	0.794806	-1.25817	SEL 24h down vs Untr
FOPNL	0.000439204	0.794587	-1.25852	SEL 24h down vs Untr
CAMK2D	6.6768e-05	0.794465	-1.25871	SEL 24h down vs Untr
MAN2C1	0.000712108	0.793972	-1.25949	SEL 24h down vs Untr
HIST1H2BN	0.000792544	0.792907	-1.26118	SEL 24h down vs Untr
DCAF6	5.48737e-05	0.792827	-1.26131	SEL 24h down vs Untr
MON2	0.000243875	0.792622	-1.26163	SEL 24h down vs Untr
MAP3K12	0.000775949	0.792458	-1.2619	SEL 24h down vs Untr
CKAP4	0.000907836	0.791751	-1.26302	SEL 24h down vs Untr
B3GALT4	0.000137104	0.791443	-1.26352	SEL 24h down vs Untr
B3GALT4	0.000137104	0.791443	-1.26352	SEL 24h down vs Untr
B3GALT4	0.000137104	0.791443	-1.26352	SEL 24h down vs Untr
TM4SF1	0.000441741	0.789954	-1.2659	SEL 24h down vs Untr
NNT	0.000767461	0.78921	-1.26709	SEL 24h down vs Untr
GOLGA8DP	0.000218649	0.789013	-1.26741	SEL 24h down vs Untr
SATB1	6.35591e-05	0.788958	-1.26749	SEL 24h down vs Untr
RASA4	0.000290889	0.788229	-1.26867	SEL 24h down vs Untr
CDC42BPB	1.30675e-05	0.786896	-1.27082	SEL 24h down vs Untr
TIAM2	0.00136226	0.786518	-1.27143	SEL 24h down vs Untr
CUL4A	0.000635399	0.78362	-1.27613	SEL 24h down vs Untr
MOV10	0.000236828	0.783351	-1.27657	SEL 24h down vs Untr
WNT5A	0.000746587	0.782812	-1.27745	SEL 24h down vs Untr
SMA5	0.00159887	0.782293	-1.27829	SEL 24h down vs Untr
LAMC3	0.000824893	0.781169	-1.28013	SEL 24h down vs Untr
RAVER2	5.38679e-05	0.780443	-1.28132	SEL 24h down vs Untr
FKBP11	0.00142094	0.780128	-1.28184	SEL 24h down vs Untr
FBXO27	0.00119062	0.779707	-1.28253	SEL 24h down vs Untr
KLHL29	0.000239931	0.779529	-1.28283	SEL 24h down vs Untr
SMA4	0.00150487	0.779237	-1.28331	SEL 24h down vs Untr
RASA4	0.00105245	0.778917	-1.28383	SEL 24h down vs Untr
TMTC1	0.000419218	0.77858	-1.28439	SEL 24h down vs Untr
CTSL2	3.76476e-05	0.778219	-1.28499	SEL 24h down vs Untr
PSPC1	5.72238e-06	0.777617	-1.28598	SEL 24h down vs Untr
TRNAA46P	0.00011194	0.776507	-1.28782	SEL 24h down vs Untr
SUN2	0.000278594	0.776417	-1.28797	SEL 24h down vs Untr
CASP4	0.000639045	0.7762	-1.28833	SEL 24h down vs Untr
B9D1	0.000879514	0.774544	-1.29108	SEL 24h down vs Untr
TRPC1	0.000254474	0.774223	-1.29162	SEL 24h down vs Untr
MARK4	0.000128369	0.77402	-1.29196	SEL 24h down vs Untr
OTUB2	0.00110132	0.773462	-1.29289	SEL 24h down vs Untr
PIR	0.00075088	0.773202	-1.29332	SEL 24h down vs Untr
CUX1	0.00059397	0.772954	-1.29374	SEL 24h down vs Untr
NEXN-AS1	0.000362569	0.771199	-1.29668	SEL 24h down vs Untr
LY75-CD302	5.6011e-06	0.771091	-1.29686	SEL 24h down vs Untr
KIAA0564	0.000853154	0.770727	-1.29748	SEL 24h down vs Untr
HLA-B	0.00155218	0.769483	-1.29957	SEL 24h down vs Untr
NAIP	0.00153209	0.76898	-1.30042	SEL 24h down vs Untr
NAIP	0.00153209	0.76898	-1.30042	SEL 24h down vs Untr
MCCC1	0.000515897	0.768852	-1.30064	SEL 24h down vs Untr
SH3PXD2A	0.000403709	0.768739	-1.30083	SEL 24h down vs Untr
PQLC3	0.00132467	0.768562	-1.30113	SEL 24h down vs Untr
PAN2	0.00150807	0.76826	-1.30164	SEL 24h down vs Untr
GNE	0.000376761	0.768007	-1.30207	SEL 24h down vs Untr
LOC100133131	8.42083e-05	0.767457	-1.303	SEL 24h down vs Untr
LRP4	8.87131e-05	0.767284	-1.3033	SEL 24h down vs Untr
ITGB5	0.000118262	0.767034	-1.30372	SEL 24h down vs Untr
PAPLN	0.000797384	0.767	-1.30378	SEL 24h down vs Untr
DPP7	0.000666419	0.766733	-1.30424	SEL 24h down vs Untr
CHCHD6	6.37218e-05	0.766429	-1.30475	SEL 24h down vs Untr
SMA4	0.000390516	0.766295	-1.30498	SEL 24h down vs Untr
SMA5	0.000318119	0.766093	-1.30532	SEL 24h down vs Untr
MFI2	0.00106398	0.765915	-1.30563	SEL 24h down vs Untr
GUSBP1	0.00046388	0.765582	-1.3062	SEL 24h down vs Untr
ADARB2	0.00111932	0.765547	-1.30626	SEL 24h down vs Untr
OCEL1	0.0014433	0.764945	-1.30728	SEL 24h down vs Untr
NUP62CL	0.000943314	0.764868	-1.30741	SEL 24h down vs Untr
SCML2	0.00025835	0.764679	-1.30774	SEL 24h down vs Untr
ABHD15	0.000211547	0.764323	-1.30835	SEL 24h down vs Untr
MMP11	0.000553284	0.76393	-1.30902	SEL 24h down vs Untr
HACE1	0.00161943	0.763226	-1.31023	SEL 24h down vs Untr
HLA-B	0.00113901	0.762956	-1.31069	SEL 24h down vs Untr
GOLGA8DP	3.10027e-05	0.762622	-1.31127	SEL 24h down vs Untr
CCDC88A	0.000731515	0.761752	-1.31276	SEL 24h down vs Untr
ZNF367	7.23378e-05	0.759445	-1.31675	SEL 24h down vs Untr
FGFR3	0.000945584	0.758925	-1.31765	SEL 24h down vs Untr
WHAMMP3	0.00161947	0.758831	-1.31782	SEL 24h down vs Untr
LTBP4	0.00105453	0.758476	-1.31843	SEL 24h down vs Untr
KNTC1	7.35405e-05	0.75825	-1.31883	SEL 24h down vs Untr
SEZ6L2	0.00144069	0.757513	-1.32011	SEL 24h down vs Untr
AGPAT4	0.00147066	0.754416	-1.32553	SEL 24h down vs Untr
SYCE2	0.000134257	0.751712	-1.3303	SEL 24h down vs Untr
MGC57346	0.000524032	0.749503	-1.33422	SEL 24h down vs Untr
VAMP1	0.00114077	0.749403	-1.33439	SEL 24h down vs Untr
MSH5-SAPCD1	0.000792644	0.748502	-1.336	SEL 24h down vs Untr
ITPR1	1.17328e-05	0.747579	-1.33765	SEL 24h down vs Untr
CLTCL1	5.5582e-05	0.746834	-1.33899	SEL 24h down vs Untr
EMC2	0.000892606	0.746459	-1.33966	SEL 24h down vs Untr
DHTKD1	0.000399554	0.74645	-1.33967	SEL 24h down vs Untr
CPD	0.000437564	0.745708	-1.34101	SEL 24h down vs Untr
CCDC14	0.000307284	0.744923	-1.34242	SEL 24h down vs Untr
NBAS	0.001453	0.74219	-1.34736	SEL 24h down vs Untr
TAF4B	0.000648512	0.742176	-1.34739	SEL 24h down vs Untr
LIG3	8.56309e-05	0.741444	-1.34872	SEL 24h down vs Untr
RGS10	0.000939975	0.741298	-1.34899	SEL 24h down vs Untr
REEP2	4.13763e-05	0.74126	-1.34905	SEL 24h down vs Untr
MYO7A	1.10112e-05	0.741128	-1.3493	SEL 24h down vs Untr
NRBP2	0.000168897	0.740668	-1.35013	SEL 24h down vs Untr
ZSWIM6	1.77515e-05	0.739233	-1.35275	SEL 24h down vs Untr
VWDE	0.000308309	0.73854	-1.35402	SEL 24h down vs Untr
PBXIP1	2.4212e-05	0.73731	-1.35628	SEL 24h down vs Untr
FAM20C	0.000216662	0.737172	-1.35654	SEL 24h down vs Untr
C16orf58	0.0006786	0.736437	-1.35789	SEL 24h down vs Untr
WWC2	0.00097786	0.736169	-1.35838	SEL 24h down vs Untr
FAM72D	0.000850897	0.736019	-1.35866	SEL 24h down vs Untr
GOLGA8DP	0.00010758	0.735309	-1.35997	SEL 24h down vs Untr
WWC1	0.000723361	0.735222	-1.36013	SEL 24h down vs Untr
NAIP	0.00129913	0.735182	-1.36021	SEL 24h down vs Untr
ALPK2	0.000766755	0.734839	-1.36084	SEL 24h down vs Untr
TLE6	6.70177e-05	0.734056	-1.36229	SEL 24h down vs Untr
SENP7	0.00136474	0.733859	-1.36266	SEL 24h down vs Untr
POLG	0.000931274	0.733072	-1.36412	SEL 24h down vs Untr
LUZP2	0.000477599	0.732683	-1.36485	SEL 24h down vs Untr
MAN2A2	0.000383347	0.731918	-1.36627	SEL 24h down vs Untr
ATP11B	0.000176986	0.731535	-1.36699	SEL 24h down vs Untr
LINC00339	0.00126159	0.730974	-1.36804	SEL 24h down vs Untr
CNTNAP3	0.000213187	0.730009	-1.36985	SEL 24h down vs Untr
PIK3CA	0.000824205	0.728936	-1.37186	SEL 24h down vs Untr
CECR5-AS1	0.000792986	0.728764	-1.37219	SEL 24h down vs Untr
CXorf24	2.02286e-05	0.728599	-1.3725	SEL 24h down vs Untr
POLR3GL	0.00048588	0.727926	-1.37377	SEL 24h down vs Untr
FAM72D	0.000613596	0.72785	-1.37391	SEL 24h down vs Untr
PSMB9	8.70891e-05	0.727837	-1.37393	SEL 24h down vs Untr
PSMB9	8.70891e-05	0.727837	-1.37393	SEL 24h down vs Untr
PSMB9	8.70891e-05	0.727837	-1.37393	SEL 24h down vs Untr
SCRN2	0.000450639	0.727504	-1.37456	SEL 24h down vs Untr
UST	0.00119581	0.727308	-1.37493	SEL 24h down vs Untr
SLC25A27	0.000493024	0.726692	-1.3761	SEL 24h down vs Untr
HABP4	0.00116432	0.726361	-1.37673	SEL 24h down vs Untr
HMGB2	0.00025368	0.725953	-1.3775	SEL 24h down vs Untr
FAM72D	0.000899195	0.725412	-1.37853	SEL 24h down vs Untr
TBC1D1	2.27617e-06	0.724881	-1.37954	SEL 24h down vs Untr
CIT	9.26978e-05	0.72402	-1.38118	SEL 24h down vs Untr
RBL2	0.000377856	0.723861	-1.38148	SEL 24h down vs Untr
CUL7	0.000751103	0.723399	-1.38236	SEL 24h down vs Untr
LIMCH1	0.00147625	0.721483	-1.38603	SEL 24h down vs Untr
TTLL3	0.000757446	0.720582	-1.38777	SEL 24h down vs Untr
ZSWIM4	0.000313983	0.719957	-1.38897	SEL 24h down vs Untr
RGL3	0.000930333	0.719277	-1.39029	SEL 24h down vs Untr
LAMB1	2.23134e-05	0.719213	-1.39041	SEL 24h down vs Untr
NOTCH2NL	0.000159135	0.71892	-1.39098	SEL 24h down vs Untr
DNMBP	0.000168086	0.718233	-1.39231	SEL 24h down vs Untr
ALDH5A1	0.00110542	0.718037	-1.39269	SEL 24h down vs Untr
COL4A2	0.000454792	0.717932	-1.39289	SEL 24h down vs Untr
FAHD2B	6.0189e-05	0.717739	-1.39326	SEL 24h down vs Untr
MEGF8	3.02859e-05	0.716513	-1.39565	SEL 24h down vs Untr
FAM132B	0.000357664	0.71631	-1.39604	SEL 24h down vs Untr
MAN2B1	0.000192677	0.715793	-1.39705	SEL 24h down vs Untr
YBX2	9.48621e-05	0.715615	-1.3974	SEL 24h down vs Untr
TFAP2A	3.58397e-05	0.715426	-1.39777	SEL 24h down vs Untr
RNF213	0.000880065	0.715312	-1.39799	SEL 24h down vs Untr
CNTNAP3	0.000132788	0.714868	-1.39886	SEL 24h down vs Untr
MSH5-SAPCD1	0.000512381	0.714096	-1.40037	SEL 24h down vs Untr
WDR26	0.000189085	0.713835	-1.40088	SEL 24h down vs Untr
OCRL	3.57797e-05	0.71341	-1.40172	SEL 24h down vs Untr
TBC1D8	2.77493e-05	0.713299	-1.40194	SEL 24h down vs Untr
MATN2	0.000637121	0.713152	-1.40223	SEL 24h down vs Untr
CUL9	0.000786994	0.712877	-1.40277	SEL 24h down vs Untr
COL5A2	0.000239147	0.712033	-1.40443	SEL 24h down vs Untr
TMEFF1	0.000437837	0.712028	-1.40444	SEL 24h down vs Untr
SELM	0.0014157	0.71191	-1.40467	SEL 24h down vs Untr
CMIP	5.80829e-05	0.710111	-1.40823	SEL 24h down vs Untr
GOLGA8F	0.00015051	0.709679	-1.40909	SEL 24h down vs Untr
SAT1	0.000789133	0.708797	-1.41084	SEL 24h down vs Untr
CDK5RAP3	0.000926172	0.708346	-1.41174	SEL 24h down vs Untr
C6orf225	0.000487002	0.707273	-1.41388	SEL 24h down vs Untr
DMXL2	0.000838876	0.70682	-1.41479	SEL 24h down vs Untr
HERC1	0.000425524	0.706777	-1.41487	SEL 24h down vs Untr
ABCC4	0.000134079	0.703064	-1.42235	SEL 24h down vs Untr
C9orf72	0.00136791	0.702965	-1.42255	SEL 24h down vs Untr
ME3	0.000242618	0.701853	-1.4248	SEL 24h down vs Untr
RPL12	0.00131868	0.701828	-1.42485	SEL 24h down vs Untr
FN3K	0.000319893	0.701129	-1.42627	SEL 24h down vs Untr
ADRA2C	0.00014992	0.699218	-1.43017	SEL 24h down vs Untr
AFAP1	5.96228e-05	0.698897	-1.43083	SEL 24h down vs Untr
MSLN	0.000453203	0.698411	-1.43182	SEL 24h down vs Untr
CNOT6L	0.00141241	0.696524	-1.4357	SEL 24h down vs Untr
PRKCH	0.00047779	0.69492	-1.43901	SEL 24h down vs Untr
APBB2	0.000512597	0.694216	-1.44047	SEL 24h down vs Untr
MAN2A1	0.000305178	0.693676	-1.4416	SEL 24h down vs Untr
GRB14	0.00044988	0.693273	-1.44243	SEL 24h down vs Untr
CYFIP1	3.91913e-05	0.692249	-1.44457	SEL 24h down vs Untr
RGCC	0.000219757	0.692214	-1.44464	SEL 24h down vs Untr
PKN1	0.000731092	0.691551	-1.44602	SEL 24h down vs Untr
SVEP1	0.000554131	0.691496	-1.44614	SEL 24h down vs Untr
PCID2	0.000546024	0.691072	-1.44703	SEL 24h down vs Untr
SH3BGRL2	0.00105931	0.691009	-1.44716	SEL 24h down vs Untr
DGKD	0.000127214	0.690709	-1.44779	SEL 24h down vs Untr
DLG2	0.000170847	0.689857	-1.44958	SEL 24h down vs Untr
RIMKLB	0.000467609	0.688922	-1.45154	SEL 24h down vs Untr
CAPRIN2	0.00155783	0.688801	-1.4518	SEL 24h down vs Untr
HLTF	0.000254028	0.688725	-1.45196	SEL 24h down vs Untr
ANKRD44	0.000221008	0.688266	-1.45293	SEL 24h down vs Untr
FGD6	0.000283026	0.688221	-1.45302	SEL 24h down vs Untr
HPSE	0.000441767	0.687376	-1.45481	SEL 24h down vs Untr
ABCA2	0.000154786	0.686842	-1.45594	SEL 24h down vs Untr
SERTAD4	0.00115275	0.686597	-1.45646	SEL 24h down vs Untr
TGFBR3	0.000907494	0.686473	-1.45672	SEL 24h down vs Untr
INSIG1	0.0002749	0.686249	-1.4572	SEL 24h down vs Untr
ZC3H11A	0.00114011	0.685449	-1.4589	SEL 24h down vs Untr
SEMA6D	0.000554584	0.683993	-1.462	SEL 24h down vs Untr
ACSS2	4.06865e-05	0.683747	-1.46253	SEL 24h down vs Untr
TRAPPC9	0.000370243	0.683313	-1.46346	SEL 24h down vs Untr
FGFR4	6.39279e-05	0.682954	-1.46423	SEL 24h down vs Untr
USP48	5.22167e-05	0.682041	-1.46619	SEL 24h down vs Untr
GSTM3	5.70563e-08	0.681528	-1.46729	SEL 24h down vs Untr
PRSS8	8.25936e-05	0.681198	-1.468	SEL 24h down vs Untr
IQGAP3	0.000214578	0.680671	-1.46914	SEL 24h down vs Untr
LAMA3	7.33699e-05	0.680068	-1.47044	SEL 24h down vs Untr
PPM1J	5.70514e-06	0.679706	-1.47122	SEL 24h down vs Untr
KLHL36	2.48684e-05	0.679505	-1.47166	SEL 24h down vs Untr
SLC47A1	0.000377864	0.679412	-1.47186	SEL 24h down vs Untr
PTPRS	0.000209718	0.679088	-1.47256	SEL 24h down vs Untr
RHEBL1	0.000185714	0.678105	-1.4747	SEL 24h down vs Untr
CCDC126	2.94622e-05	0.677291	-1.47647	SEL 24h down vs Untr
LRBA	1.0944e-05	0.677147	-1.47678	SEL 24h down vs Untr
C4orf21	0.000125767	0.676874	-1.47738	SEL 24h down vs Untr
HSD17B6	1.4367e-05	0.675319	-1.48078	SEL 24h down vs Untr
SEPP1	0.000483574	0.675289	-1.48085	SEL 24h down vs Untr
NRP2	0.00145261	0.675236	-1.48096	SEL 24h down vs Untr
GAA	0.00106989	0.675232	-1.48097	SEL 24h down vs Untr
TLE2	0.000203722	0.675204	-1.48103	SEL 24h down vs Untr
ITGB3	4.58584e-06	0.673788	-1.48415	SEL 24h down vs Untr
TXNRD3	0.000409952	0.671737	-1.48868	SEL 24h down vs Untr
DENND3	0.000363871	0.670822	-1.49071	SEL 24h down vs Untr
THBS3	0.000114265	0.670179	-1.49214	SEL 24h down vs Untr
CNTNAP3	0.000290495	0.66949	-1.49367	SEL 24h down vs Untr
TMEM2	0.000329988	0.668697	-1.49545	SEL 24h down vs Untr
LMBR1L	1.50085e-08	0.667039	-1.49916	SEL 24h down vs Untr
MOB1B	0.000168155	0.666777	-1.49975	SEL 24h down vs Untr
ALDH6A1	0.000281429	0.666345	-1.50072	SEL 24h down vs Untr
EFHD1	0.000177115	0.666035	-1.50142	SEL 24h down vs Untr
ATAD1	0.000174822	0.665532	-1.50256	SEL 24h down vs Untr
ICAM5	0.000286571	0.665333	-1.50301	SEL 24h down vs Untr
PCSK9	0.000597711	0.664998	-1.50376	SEL 24h down vs Untr
CD83	9.99366e-07	0.664174	-1.50563	SEL 24h down vs Untr
SIPA1L2	0.000145337	0.664052	-1.50591	SEL 24h down vs Untr
PRSS23	0.000502577	0.663138	-1.50798	SEL 24h down vs Untr
FGD4	0.00101867	0.662922	-1.50847	SEL 24h down vs Untr
BCAM	8.2245e-05	0.662166	-1.5102	SEL 24h down vs Untr
NUCB2	0.000174052	0.66141	-1.51192	SEL 24h down vs Untr
DAPK1	0.00099869	0.660929	-1.51302	SEL 24h down vs Untr
PLEKHH1	0.000605559	0.660854	-1.51319	SEL 24h down vs Untr
TBC1D5	1.4315e-05	0.660608	-1.51376	SEL 24h down vs Untr
MIB1	0.00027369	0.660436	-1.51415	SEL 24h down vs Untr
MIR148B	0.000281432	0.660118	-1.51488	SEL 24h down vs Untr
IRS1	5.27697e-06	0.658691	-1.51816	SEL 24h down vs Untr
GPR126	0.000260616	0.65784	-1.52013	SEL 24h down vs Untr
CLIP4	8.38196e-05	0.656454	-1.52334	SEL 24h down vs Untr
SLC2A13	5.44041e-05	0.656046	-1.52428	SEL 24h down vs Untr
SEL1L3	0.000521867	0.655892	-1.52464	SEL 24h down vs Untr
NIPSNAP3B	0.00144246	0.655308	-1.526	SEL 24h down vs Untr
TMEM136	0.000336525	0.653689	-1.52978	SEL 24h down vs Untr
FAM43A	0.000270738	0.653564	-1.53007	SEL 24h down vs Untr
ALDH1L2	0.000622966	0.652296	-1.53305	SEL 24h down vs Untr
SLC4A7	0.000118536	0.652229	-1.5332	SEL 24h down vs Untr
RNF19A	3.61024e-05	0.650485	-1.53732	SEL 24h down vs Untr
DNHD1	2.2527e-05	0.650323	-1.5377	SEL 24h down vs Untr
PDGFA	3.17608e-05	0.645939	-1.54813	SEL 24h down vs Untr
FAM72D	0.000287315	0.645154	-1.55002	SEL 24h down vs Untr
PKDCC	0.000106858	0.644999	-1.55039	SEL 24h down vs Untr
IFITM10	5.8906e-05	0.644754	-1.55098	SEL 24h down vs Untr
CDK14	0.000324522	0.644028	-1.55273	SEL 24h down vs Untr
HEATR5A	0.000206566	0.643524	-1.55394	SEL 24h down vs Untr
DNM1	5.27922e-06	0.6419	-1.55787	SEL 24h down vs Untr
USP2	8.2166e-06	0.64082	-1.5605	SEL 24h down vs Untr
MAP2K6	0.000449451	0.640694	-1.56081	SEL 24h down vs Untr
MFSD12	7.50532e-05	0.63914	-1.5646	SEL 24h down vs Untr
TESC	3.72605e-06	0.639121	-1.56465	SEL 24h down vs Untr
TTC39B	0.000244064	0.635702	-1.57306	SEL 24h down vs Untr
DIAPH3	2.56474e-06	0.634077	-1.5771	SEL 24h down vs Untr
ULK2	6.09448e-06	0.633929	-1.57746	SEL 24h down vs Untr
VPS13A	0.000431516	0.633607	-1.57827	SEL 24h down vs Untr
ADAMTS5	5.8993e-05	0.63353	-1.57846	SEL 24h down vs Untr
FRY	3.84196e-05	0.633508	-1.57851	SEL 24h down vs Untr
IGF1R	0.000149379	0.633458	-1.57864	SEL 24h down vs Untr
DACT2	1.79747e-05	0.6333	-1.57903	SEL 24h down vs Untr
ACAD10	4.74143e-06	0.6328	-1.58028	SEL 24h down vs Untr
UTRN	0.00139845	0.632255	-1.58164	SEL 24h down vs Untr
CAV2	0.000258681	0.631839	-1.58268	SEL 24h down vs Untr
SEMA3C	0.000223953	0.631041	-1.58468	SEL 24h down vs Untr
ANKRD13C	4.00245e-05	0.629706	-1.58804	SEL 24h down vs Untr
LPCAT4	0.000106067	0.629543	-1.58845	SEL 24h down vs Untr
GPR133	0.000698124	0.628946	-1.58996	SEL 24h down vs Untr
PLGRKT	7.23216e-05	0.628752	-1.59045	SEL 24h down vs Untr
GOLGA8IP	1.66277e-05	0.627883	-1.59265	SEL 24h down vs Untr
PPP1R15B	0.00157393	0.627398	-1.59388	SEL 24h down vs Untr
LIFR	3.26706e-05	0.627129	-1.59457	SEL 24h down vs Untr
GABRE	7.55526e-05	0.62423	-1.60197	SEL 24h down vs Untr
ABCC3	0.000951313	0.623703	-1.60333	SEL 24h down vs Untr
ASMTL	0.000128659	0.623651	-1.60346	SEL 24h down vs Untr
DOCK4	0.000108199	0.623528	-1.60378	SEL 24h down vs Untr
ACBD7	0.00129136	0.622604	-1.60616	SEL 24h down vs Untr
PLCG2	0.00127835	0.620952	-1.61043	SEL 24h down vs Untr
ETNK2	4.40464e-05	0.61955	-1.61408	SEL 24h down vs Untr
GCA	1.25511e-05	0.617844	-1.61853	SEL 24h down vs Untr
ATF4	0.000492183	0.61568	-1.62422	SEL 24h down vs Untr
MYO6	1.72625e-05	0.612871	-1.63166	SEL 24h down vs Untr
COL4A1	5.74158e-05	0.612863	-1.63169	SEL 24h down vs Untr
LRRC23	0.000122183	0.610602	-1.63773	SEL 24h down vs Untr
ADAMTS1	0.000638217	0.609607	-1.6404	SEL 24h down vs Untr
HSD17B8	0.000272218	0.607461	-1.6462	SEL 24h down vs Untr
HSD17B8	0.000272218	0.607461	-1.6462	SEL 24h down vs Untr
HSD17B8	0.000272218	0.607461	-1.6462	SEL 24h down vs Untr
SYCP2	0.000389884	0.60739	-1.64639	SEL 24h down vs Untr
RBMS3	0.000471475	0.606918	-1.64767	SEL 24h down vs Untr
BMP6	0.000817264	0.606646	-1.64841	SEL 24h down vs Untr
PTPRF	0.000382982	0.605626	-1.65119	SEL 24h down vs Untr
A2M	0.000193803	0.603645	-1.6566	SEL 24h down vs Untr
C1QL4	0.000411996	0.602967	-1.65846	SEL 24h down vs Untr
NAGA	0.000222144	0.59936	-1.66845	SEL 24h down vs Untr
OLAH	1.94938e-05	0.597265	-1.6743	SEL 24h down vs Untr
SRGAP3	1.98952e-05	0.595747	-1.67856	SEL 24h down vs Untr
ERO1LB	1.4676e-05	0.591733	-1.68995	SEL 24h down vs Untr
FGFR2	4.69319e-06	0.591705	-1.69003	SEL 24h down vs Untr
VTRNA1-3	0.00096186	0.590781	-1.69267	SEL 24h down vs Untr
PROCR	3.97612e-06	0.590631	-1.69311	SEL 24h down vs Untr
PIEZO1	0.000335872	0.590609	-1.69317	SEL 24h down vs Untr
PDE5A	0.000162462	0.589427	-1.69656	SEL 24h down vs Untr
PLAC1	0.000322018	0.588365	-1.69962	SEL 24h down vs Untr
GOLGA8F	3.20322e-05	0.587982	-1.70073	SEL 24h down vs Untr
TRNAE29P	0.00125482	0.587516	-1.70208	SEL 24h down vs Untr
MSH5	8.68229e-05	0.587449	-1.70227	SEL 24h down vs Untr
LTBP1	3.66318e-05	0.585891	-1.7068	SEL 24h down vs Untr
MYLK	5.54257e-05	0.584247	-1.71161	SEL 24h down vs Untr
PTPRU	0.000208805	0.583947	-1.71248	SEL 24h down vs Untr
RCN3	3.11068e-05	0.582305	-1.71731	SEL 24h down vs Untr
KIAA0825	2.08115e-07	0.580456	-1.72278	SEL 24h down vs Untr
ASMTL	8.58549e-05	0.576212	-1.73547	SEL 24h down vs Untr
NFE2L3	0.000482193	0.575752	-1.73686	SEL 24h down vs Untr
ACSF2	0.000703765	0.57554	-1.7375	SEL 24h down vs Untr
C18orf54	5.3087e-05	0.574497	-1.74065	SEL 24h down vs Untr
ID2	1.15381e-06	0.57237	-1.74712	SEL 24h down vs Untr
GOLGA8IP	2.77174e-06	0.572347	-1.74719	SEL 24h down vs Untr
FBLN7	1.78791e-05	0.568508	-1.75899	SEL 24h down vs Untr
KIAA1107	0.00107669	0.567614	-1.76176	SEL 24h down vs Untr
THSD4	9.92567e-05	0.566121	-1.76641	SEL 24h down vs Untr
RASL11A	1.26864e-05	0.565865	-1.7672	SEL 24h down vs Untr
GDPD1	0.00117058	0.563491	-1.77465	SEL 24h down vs Untr
LINGO2	0.000189396	0.562703	-1.77714	SEL 24h down vs Untr
MSH5-SAPCD1	0.000219624	0.555921	-1.79882	SEL 24h down vs Untr
PTGR2	6.03278e-05	0.555357	-1.80064	SEL 24h down vs Untr
LRP1	0.000264291	0.555118	-1.80142	SEL 24h down vs Untr
ASIC1	0.000513995	0.55458	-1.80316	SEL 24h down vs Untr
MIR15A	3.91977e-05	0.554135	-1.80462	SEL 24h down vs Untr
AK7	0.000993471	0.551989	-1.81163	SEL 24h down vs Untr
GDA	0.000249035	0.551833	-1.81214	SEL 24h down vs Untr
IMMP2L	0.000121563	0.549966	-1.8183	SEL 24h down vs Untr
DEFB1	1.93237e-05	0.545248	-1.83403	SEL 24h down vs Untr
FLJ35776	1.51319e-05	0.543766	-1.83902	SEL 24h down vs Untr
MIR600HG	2.05464e-05	0.53921	-1.85456	SEL 24h down vs Untr
MMP15	0.000454809	0.538565	-1.85679	SEL 24h down vs Untr
GOLGA8IP	5.23406e-06	0.533089	-1.87586	SEL 24h down vs Untr
ZC3H6	0.000339248	0.531929	-1.87995	SEL 24h down vs Untr
CES3	4.09481e-05	0.531508	-1.88144	SEL 24h down vs Untr
GOLGA8IP	1.46271e-05	0.529133	-1.88988	SEL 24h down vs Untr
KIAA0825	1.15284e-05	0.524566	-1.90634	SEL 24h down vs Untr
GOLGA8IP	1.81258e-06	0.523414	-1.91053	SEL 24h down vs Untr
HHLA3	0.00023757	0.521923	-1.91599	SEL 24h down vs Untr
WIPI1	0.000651432	0.516348	-1.93668	SEL 24h down vs Untr
FAT4	7.18995e-05	0.513472	-1.94753	SEL 24h down vs Untr
LOC100130581	0.00159524	0.513031	-1.9492	SEL 24h down vs Untr
SCARNA9L	0.00148553	0.506702	-1.97355	SEL 24h down vs Untr
ZNF831	3.44269e-06	0.502939	-1.98831	SEL 24h down vs Untr
GOLGA8IP	7.05119e-07	0.501067	-1.99574	SEL 24h down vs Untr
EML2	7.40226e-06	0.494245	-2.02329	SEL 24h down vs Untr
REEP3	2.44717e-06	0.490844	-2.03731	SEL 24h down vs Untr
CCBL1	6.23694e-06	0.487703	-2.05043	SEL 24h down vs Untr
LINC00319	1.46435e-06	0.48715	-2.05276	SEL 24h down vs Untr
NTN4	4.56667e-05	0.487122	-2.05287	SEL 24h down vs Untr
HSPG2	0.000252994	0.482058	-2.07444	SEL 24h down vs Untr
SMAD2	1.76342e-05	0.472906	-2.11458	SEL 24h down vs Untr
DNHD1	0.000161779	0.470437	-2.12568	SEL 24h down vs Untr
GOLGA8IP	1.00605e-06	0.460333	-2.17234	SEL 24h down vs Untr
NEDD9	0.000200106	0.451352	-2.21557	SEL 24h down vs Untr
SLC46A3	1.2179e-05	0.431329	-2.31841	SEL 24h down vs Untr
PRICKLE1	0.000582144	0.425533	-2.34999	SEL 24h down vs Untr
PCID2	0.000107719	0.425358	-2.35096	SEL 24h down vs Untr
CTH	0.00065799	0.418023	-2.39221	SEL 24h down vs Untr
HSPA2	5.16375e-06	0.417216	-2.39684	SEL 24h down vs Untr
UNC5A	2.84559e-06	0.416722	-2.39968	SEL 24h down vs Untr
LPL	4.19332e-06	0.406444	-2.46037	SEL 24h down vs Untr
LOC643699	1.83137e-05	0.390224	-2.56263	SEL 24h down vs Untr
LOC643699	1.83137e-05	0.390224	-2.56263	SEL 24h down vs Untr
ANO2	0.00110787	0.298546	-3.34957	SEL 24h down vs Untr
