# Supplementary material for: Selective Inhibition of SIN3 Corepressor with Avermectins as a Novel Therapeutic Strategy in Triple-Negative Breast Cancer
Source: Oxford University Press journal article supplement (doi:10.1158/1535-7163.mct-14-0980-t), 2015-06-15
Supplement: 15357163mct140980t-sup-140870_2_supp_2980365_nvdvvw.xlsx [file 15357163mct140980t-sup-140870_2_supp_2980365_nvdvvw.xlsx]

## Sheet: Ingenuity Canonical Pathways
Ingenuity canonical pathways modulated by selamectin	-log(p-value)	Ratio	z-score	Molecules
ILK Signaling	4.34E00	1.08E-01	-0.229	PIK3R3,ITGB5,IRS1,PARVA,GSK3A,MUC1,TESK1,AKT2,DOCK1,RELA,VIM,PDPK1,ATF4,PIK3CA,PPM1J,CASP3,ITGB3,CDH1,MAP2K6,ACTG2
Cysteine Biosynthesis III (mammalia)	4.2E00	3.16E-01		FTSJ1,PRMT5,PRMT3,NSUN4,SUV39H2,CTH
Glioma Signaling	4.06E00	1.37E-01	-0.905	PDGFRB,PIK3R3,RBL2,CAMK2D,TP53,AKT2,PLCG2,IGF1R,PIK3CA,MDM2,PRKCH,RB1,PDGFA
Superpathway of Methionine Degradation	3.7E00	2.19E-01		FTSJ1,PRMT5,MUT,PRMT3,NSUN4,SUV39H2,CTH
Huntington's Disease Signaling	3.51E00	9.13E-02		HSPA2,PIK3R3,YKT6,ATP5J,PSMF1,DNM1,NSF,HDAC3,TP53,AKT2,PSME3,IGF1R,PDPK1,ATF4,GNG5,PIK3CA,CASP3,ITPR1,PRKCH,CLTCL1,CASP4
Methionine Degradation I (to Homocysteine)	3.41E00	2.94E-01		FTSJ1,PRMT5,PRMT3,NSUN4,SUV39H2
Protein Ubiquitination Pathway	3.31E00	8.63E-02		HSPA2,PSMA4,HSPB8,DNAJC25,USP21,PSMD11,UBE2G1,PSMC4,PSMB1,PSMC2,USP15,USP2,UCHL3,PSMD14,PSMC1,UBE2Q1,HLA-B,MDM2,PSMB2,PAN2,PSMB9,USP48
Melanoma Signaling	2.94E00	1.67E-01		PIK3R3,PIK3CA,CDH1,MDM2,RB1,TP53,AKT2
p53 Signaling	2.79E00	1.12E-01	0.000	TNFRSF10A,PIK3R3,PIK3CA,TRIM29,MDM2,RB1,TP53,AKT2,C12orf5,TP53I3,CHEK1
PTEN Signaling	2.63E00	1.02E-01	0.577	FGFR3,IGF1R,PDGFRB,PIK3R3,PDPK1,OCRL,PIK3CA,TGFBR3,CASP3,GSK3A,AKT2,RELA
Human Embryonic Stem Cell Pluripotency	2.62E00	9.7E-02		FGFR3,PDGFRB,PIK3R3,WNT5A,SMAD2,SALL4,GSK3A,AKT2,PDPK1,PIK3CA,BMP6,PDGFA,WNT9A
Virus Entry via Endocytic Pathways	2.59E00	1.12E-01		PIK3R3,ITGB5,PIK3CA,ITGB3,HLA-B,PRKCH,DNM1,CLTCL1,ACTG2,PLCG2
HER-2 Signaling in Breast Cancer	2.54E00	1.18E-01		PIK3R3,ITGB5,PIK3CA,ITGB3,PRKCH,GSK3A,MDM2,TP53,AKT2
Mismatch Repair in Eukaryotes	2.53E00	2.5E-01		PMS2,EXO1,MLH1,MSH3
NGF Signaling	2.49E00	1.03E-01	0.905	PIK3R3,PDPK1,ATF4,PIK3CA,MAP3K2,MAP3K12,MAPK7,TP53,AKT2,RELA,PLCG2
Non-Small Cell Lung Cancer Signaling	2.42E00	1.23E-01	0.000	PIK3R3,PDPK1,PIK3CA,RXRA,ITPR1,RB1,TP53,AKT2
Docosahexaenoic Acid (DHA) Signaling	2.41E00	1.54E-01		PIK3R3,PDPK1,PIK3CA,CASP3,GSK3A,AKT2
Inhibition of Matrix Metalloproteases	2.41E00	1.54E-01		A2M,MMP11,HSPG2,TIMP4,LRP1,MMP15
Endometrial Cancer Signaling	2.39E00	1.35E-01		PIK3R3,PDPK1,PIK3CA,MLH1,CDH1,TP53,AKT2
Inosine-5'-phosphate Biosynthesis II	2.35E00	6.67E-01		ADSL,PAICS
Prostate Cancer Signaling	2.32E00	1.1E-01		PIK3R3,PDPK1,ATF4,PIK3CA,MDM2,RB1,TP53,AKT2,RELA
Glioblastoma Multiforme Signaling	2.3E00	8.9E-02	-0.832	PDGFRB,PIK3R3,WNT5A,TP53,AKT2,PLCG2,IGF1R,PIK3CA,ITPR1,MDM2,RB1,PDGFA,WNT9A
Growth Hormone Signaling	2.26E00	1.16E-01	-1.134	IGF1R,A2M,PIK3R3,PDPK1,PIK3CA,IRS1,PRKCH,PLCG2
Colorectal Cancer Metastasis Signaling	2.24E00	7.63E-02	0.535	PIK3R3,MMP11,WNT5A,SMAD2,MLH1,TP53,AKT2,RELA,MSH3,GNG5,PIK3CA,TLR3,CASP3,PRKAR1B,LRP1,CDH1,MMP15,WNT9A
Role of p14/p19ARF in Tumor Suppression	2.23E00	1.67E-01	0.447	PIK3R3,PIK3CA,MDM2,RB1,TP53
AMPK Signaling	2.18E00	8.96E-02	0.333	PIK3R3,PDPK1,PPM1D,PIK3CA,PPM1J,AK7,IRS1,PRKAR1B,HLTF,ADRA2C,SLC2A1,AKT2
HIF1α Signaling	2.17E00	9.8E-02		PIK3R3,MMP11,PIK3CA,LDHA,MAPK7,MDM2,SLC2A1,MMP15,TP53,AKT2
PI3K/AKT Signaling	2.04E00	8.94E-02	0.302	PIK3R3,PDPK1,OCRL,PIK3CA,PPM1J,GSK3A,MDM2,TP53,AKT2,THEM4,RELA
Aryl Hydrocarbon Receptor Signaling	2.03E00	8.57E-02	1.414	AHRR,RBL2,ALDH1L2,GSTM3,ALDH5A1,ALDH6A1,RXRA,MDM2,RB1,TP53,RELA,CHEK1
Polyamine Regulation in Colon Cancer	2.01E00	1.82E-01		SAT1,ODC1,PSMF1,PSME3
BER pathway	1.99E00	2.5E-01		LIG3,OGG1,POLG
Estrogen-Dependent Breast Cancer Signaling	1.97E00	1.13E-01		IGF1R,PIK3R3,ATF4,PIK3CA,HSD17B8,AKT2,RELA
Chronic Myeloid Leukemia Signaling	1.96E00	9.68E-02		PIK3R3,PIK3CA,RBL2,MDM2,RB1,HDAC3,TP53,AKT2,RELA
Xenobiotic Metabolism Signaling	1.96E00	7.01E-02		PIK3R3,AHRR,GSTM3,ALDH6A1,MAP3K12,CAMK2D,UST,RELA,PIK3CA,PPM1J,MAP3K2,ALDH1L2,ALDH5A1,MAPK7,RXRA,HS6ST2,PRKCH,MAP2K6,ABCC3
Role of NFAT in Cardiac Hypertrophy	1.95E00	7.82E-02	-0.535	PIK3R3,CAMK2D,LIF,HDAC3,AKT2,PLCG2,IGF1R,GNG5,PIK3CA,ITPR1,PRKAR1B,PRKCH,MAP2K6,AKAP5
Role of NANOG in Mammalian Embryonic Stem Cell Pluripotency	1.92E00	9.01E-02	-0.378	PIK3R3,PIK3CA,WNT5A,SALL4,BMP6,LIF,TP53,LIFR,AKT2,WNT9A
Role of BRCA1 in DNA Damage Response	1.9E00	1.09E-01	0.816	RBL2,MLH1,BRCC3,HLTF,RB1,TP53,CHEK1
Pyridoxal 5'-phosphate Salvage Pathway	1.9E00	1.09E-01		DAPK1,PKN1,MAPK7,PRKCH,MAP2K6,AKT2,PNPO
GNRH Signaling	1.89E00	8.53E-02	-1.508	ATF4,MAP3K2,MAP3K12,CAMK2D,MAPK7,PRKAR1B,ITPR1,PRKCH,DNM1,MAP2K6,RELA
CMP-N-acetylneuraminate Biosynthesis I (Eukaryotes)	1.85E00	4E-01		CMAS,GNE
Ovarian Cancer Signaling	1.84E00	8.4E-02		PMS2,PIK3R3,PIK3CA,WNT5A,MLH1,PRKAR1B,RB1,TP53,AKT2,CD44,WNT9A
Hereditary Breast Cancer Signaling	1.82E00	8.7E-02		PMS2,PIK3R3,PIK3CA,MLH1,HLTF,RB1,HDAC3,TP53,AKT2,CHEK1
Erythropoietin Signaling	1.8E00	1.04E-01		PIK3R3,PDPK1,PIK3CA,PRKCH,AKT2,RELA,PLCG2
Telomerase Signaling	1.8E00	9.09E-02	1.134	ELF1,PIK3R3,PDPK1,PIK3CA,PPM1J,RB1,HDAC3,TP53,AKT2
Insulin Receptor Signaling	1.78E00	8.21E-02		ASIC1,PIK3R3,PDPK1,OCRL,PIK3CA,EIF2B1,IRS1,PRKAR1B,GSK3A,AKT2,PPP1R11
Macropinocytosis Signaling	1.77E00	1.03E-01	-1.000	PIK3R3,ITGB5,PIK3CA,ITGB3,PRKCH,PDGFA,PLCG2
Molecular Mechanisms of Cancer	1.74E00	6.3E-02		PIK3R3,WNT5A,SMAD2,CAMK2D,IRS1,GSK3A,TP53,AKT2,RABIF,RELA,NAIP,PIK3CA,BMP6,CASP3,PRKAR1B,LRP1,MDM2,CDH1,PRKCH,RB1,MAP2K6,WNT9A,CHEK1
TR/RXR Activation	1.73E00	9.41E-02		PIK3R3,PIK3CA,RXRA,MDM2,HDAC3,SLC2A1,GPS2,AKT2
Lymphotoxin β Receptor Signaling	1.73E00	1.11E-01	1.633	PIK3R3,PDPK1,PIK3CA,CASP3,AKT2,RELA
P2Y Purigenic Receptor Signaling Pathway	1.72E00	8.4E-02	0.000	PIK3R3,ATF4,GNG5,PIK3CA,PRKAR1B,ITGB3,PRKCH,AKT2,RELA,PLCG2
NF-κB Signaling	1.71E00	7.51E-02	0.277	FGFR3,PDGFRB,PIK3R3,MYD88,TGFBR3,AKT2,TBK1,RELA,PLCG2,IGF1R,PIK3CA,TLR3,MAP2K6
Role of PKR in Interferon Induction and Antiviral Response	1.71E00	1.25E-01		TLR3,CASP3,MAP2K6,TP53,RELA
Bladder Cancer Signaling	1.68E00	9.2E-02		FGFR3,MMP11,DAPK1,CDH1,MDM2,RB1,MMP15,TP53
Small Cell Lung Cancer Signaling	1.67E00	9.86E-02		PIK3R3,PIK3CA,RXRA,RB1,TP53,AKT2,RELA
B Cell Receptor Signaling	1.66E00	7.39E-02		PIK3R3,MAP3K12,CAMK2D,GSK3A,AKT2,RELA,PLCG2,PDPK1,OCRL,ATF4,PIK3CA,MAP3K2,MAP2K6
HGF Signaling	1.65E00	8.57E-02	-0.707	ELF1,PIK3R3,PIK3CA,MAP3K2,MAP3K12,PRKCH,AKT2,DOCK1,PLCG2
CDP-diacylglycerol Biosynthesis I	1.64E00	1.88E-01		LPCAT4,ABHD5,AGPAT4
eNOS Signaling	1.63E00	7.8E-02	-0.333	HSPA2,PIK3R3,PDPK1,PIK3CA,CNGB1,CASP3,PRKAR1B,ITPR1,PRKCH,AKT2,PLCG2
Glioma Invasiveness Signaling	1.62E00	1.05E-01	-0.816	PIK3R3,ITGB5,PIK3CA,TIMP4,ITGB3,CD44
NF-κB Activation by Viruses	1.61E00	9.59E-02	-0.378	PIK3R3,ITGB5,PIK3CA,ITGB3,PRKCH,AKT2,RELA
Myc Mediated Apoptosis Signaling	1.59E00	1.03E-01		IGF1R,PIK3R3,PIK3CA,CASP3,TP53,AKT2
SAPK/JNK Signaling	1.5E00	8.51E-02	0.707	PIK3R3,GNG5,PIK3CA,HNRNPK,MAP3K2,MAP3K12,IRS1,TP53
Phosphatidylglycerol Biosynthesis II (Non-plastidic)	1.5E00	1.67E-01		LPCAT4,ABHD5,AGPAT4
Protein Kinase A Signaling	1.49E00	5.96E-02		ANAPC13,DUSP12,EYA1,CNGB1,MPPE1,CAMK2D,GSK3A,PDE5A,RELA,PLCG2,ATF4,GNG5,CDC16,MYLK,PTPRU,ITPR1,PRKAR1B,PRKCH,ANAPC7,AKAP5,PTPRS,PPP1R11,PTPRR
Role of Oct4 in Mammalian Embryonic Stem Cell Pluripotency	1.47E00	1.09E-01		PPP1R8,SALL4,RB1,TP53,PCGF6
DNA damage-induced 14-3-3σ Signaling	1.44E00	1.58E-01		RAD17,TP53,AKT2
IGF-1 Signaling	1.43E00	8.25E-02	0.816	IGF1R,PIK3R3,PDPK1,PIK3CA,IRS1,PRKAR1B,AKT2,NOV
Methylthiopropionate Biosynthesis	1.41E00	1E00		ADI1
Thio-molybdenum Cofactor Biosynthesis	1.41E00	1E00		MOCOS
Acyl Carrier Protein Metabolism	1.41E00	1E00		AASDHPPT
L-cysteine Degradation II	1.41E00	1E00		CTH
Hypoxia Signaling in the Cardiovascular System	1.38E00	9.23E-02		ATF4,LDHA,UBE2Q1,MDM2,TP53,UBE2G1
Gap Junction Signaling	1.37E00	7.1E-02		PIK3R3,PIK3CA,MAP3K2,MAPK7,PRKAR1B,ITPR1,PRKCH,AKT2,NOV,ACTG2,PLCG2
Cell Cycle: G2/M DNA Damage Checkpoint Regulation	1.37E00	1.02E-01	0.447	TOP2A,PPM1D,MDM2,TP53,CHEK1
IL-9 Signaling	1.36E00	1.18E-01	0.000	PIK3R3,PIK3CA,IRS1,RELA
Inhibition of Angiogenesis by TSP1	1.36E00	1.18E-01		HSPG2,CASP3,TP53,AKT2
p70S6K Signaling	1.35E00	7.56E-02	0.333	AGT,PIK3R3,PDPK1,PIK3CA,PPM1J,IRS1,PRKCH,AKT2,PLCG2
Leucine Degradation I	1.33E00	2.22E-01		MCCC2,MCCC1
Triacylglycerol Biosynthesis	1.32E00	1.14E-01		LPCAT4,ABHD5,ELOVL1,AGPAT4
PXR/RXR Activation	1.32E00	8.96E-02		CES3,RXRA,PRKAR1B,AKT2,ABCC3,RELA
FGF Signaling	1.3E00	8.24E-02	-1.134	FGFR3,PIK3R3,ATF4,PIK3CA,ITPR1,MAP2K6,AKT2
